# Supplementary material for: Heteroleptic mononuclear Cu(i) halide complexes containing carbazolyl substituted phenyl diphosphine and monophosphine: structures and photophysical and electroluminescent properties
Source: Royal Society of Chemistry journal article supplement (doi:10.1039/d4dt02469a), 2024-01-01
Supplement: d4dt02469a1.pdf [file d4dt02469a1.pdf]

Electronic Supplementary Information for  
**Heteroleptic Mononuclear Cu(I) Halide Complexes**  
**Containing Carbazolyl Substituted Phenyl Diphosphine and**  
**Monophosphine: Structures, Photophysical and**  
**Electroluminescent Properties**

Zhun Chen<sup>a,1</sup>, Wei Xu<sup>a,1</sup>, Ruiqin Zhu<sup>b,1</sup>, Li Liu<sup>a,\*</sup>, Xin-Xin Zhong<sup>a,\*</sup>, Fa-Bao Li<sup>a,\*</sup>,  
Guijiang Zhou<sup>b,\*</sup>, Hai-Mei Qin<sup>c</sup>

<sup>a</sup> College of Chemistry and Chemical Engineering, Ministry of Education Key Laboratory for the Synthesis and Application of Organic Functional Molecules, Hubei University, Wuhan 430062, P. R. China. E-mail: liulihubei@hubu.edu.cn, xxzhong@hubu.edu.cn, lfb0615@hubu.edu.cn

<sup>b</sup> School of Chemistry, Xi'an Jiaotong University, Xi'an 710049, P. R. China. Email: zhougj@mail.xjtu.edu.cn

<sup>c</sup> Department of Chemistry, Xiamen University, Xiamen 361005, P. R. China.

<sup>1</sup> These authors are contributed equally to this work.

CCDC: 2284138-2284139, 2282048-2282050, 2285410, 2323092

## Contents

### 1. General Information

### 2. NMR and mass spectra

**Figure S1.** <sup>1</sup>H NMR spectrum of **DCzP** in CDCl<sub>3</sub>.

**Figure S2.** <sup>13</sup>C NMR spectrum of **DCzP** in CDCl<sub>3</sub>.

**Figure S3.** <sup>31</sup>P NMR spectrum of **DCzP** in CDCl<sub>3</sub>.

**Figure S4.** <sup>1</sup>H NMR spectrum of **1** in CDCl<sub>3</sub>.

**Figure S5.** <sup>31</sup>P NMR spectrum of **1** in CDCl<sub>3</sub>.

**Figure S6.** <sup>1</sup>H NMR spectrum of **2** in CDCl<sub>3</sub>.

**Figure S7.** <sup>31</sup>P NMR spectrum of **2** in CDCl<sub>3</sub>.

**Figure S8.**  $^1\text{H}$  NMR spectrum of **3** in  $\text{CDCl}_3$ .

**Figure S9.**  $^{31}\text{P}$  NMR spectrum of **3** in  $\text{CDCl}_3$ .

**Figure S10.**  $^1\text{H}$  NMR spectrum of **4** in  $\text{CDCl}_3$ .

**Figure S11.**  $^{31}\text{P}$  NMR spectrum of **4** in  $\text{CDCl}_3$ .

**Figure S12.**  $^1\text{H}$  NMR spectrum of **5** in  $\text{CDCl}_3$ .

**Figure S13.**  $^{31}\text{P}$  NMR spectrum of **5** in  $\text{CDCl}_3$ .

**Figure S14.**  $^1\text{H}$  NMR spectrum of **6** in  $\text{CDCl}_3$ .

**Figure S15.**  $^{31}\text{P}$  NMR spectrum of **6** in  $\text{CDCl}_3$ .

**Figure S16.**  $^1\text{H}$  NMR spectrum of **7** in  $\text{CDCl}_3$ .

**Figure S17.**  $^{31}\text{P}$  NMR spectrum of **7** in  $\text{CDCl}_3$ .

**Figure S18.** Mass spectrum of **DCzP**.

**Figure S19.** Mass spectrum of **1**

**Figure S20.** Mass spectrum of **2**

**Figure S21.** Mass spectrum of **3**.

**Figure S22.** Mass spectrum of **4**.

**Figure S23.** Mass spectrum of **5**.

**Figure S24.** Mass spectrum of **6**.

**Figure S25.** Mass spectrum of **7**.

### 3. Molecular structures

**Figure S26.** Intermolecular  $\text{Br}\cdots\text{H}$  ( $\text{CH}_2\text{Cl}_2$ ) interaction in **1**.

**Figure S27.** Intermolecular  $\text{Cl}\cdots\text{H}$  ( $\text{CH}_2\text{Cl}_2$ ),  $\text{Cl}\cdots\text{H}$  (phenyl) and  $\text{Cl}\cdots\text{C}$  (phenyl) interactions in **2**.

**Figure S28.** Intermolecular  $\text{I}\cdots\text{H}$  ( $\text{CH}_3$ ) interaction in **3**.

**Figure S29.** Intermolecular  $\text{Br}\cdots\text{H}$  ( $\text{CH}_3$ ) interaction in **4**.

**Figure S30.** Intermolecular  $\text{Cl}\cdots\text{H}$  ( $\text{CH}_3$ ) interaction in **5**.

**Figure S31.** Intermolecular  $\text{I}\cdots\text{H}$  (phenyl),  $\text{I}\cdots\text{H}$  ( $\text{CH}_2\text{Cl}_2$ ) interactions in **6**.

### 4. Photophysical properties

**Figure S32.** Normalized excitation spectra of **1–7** in powder at 297 K ( $\lambda_{\text{em}} = 531$  nm for **1**,  $\lambda_{\text{em}} = 555$  nm for **2**,  $\lambda_{\text{em}} = 560$  nm for **3**,  $\lambda_{\text{em}} = 535$  nm for **4**,  $\lambda_{\text{em}} = 558$  nm for **5**,

$\lambda_{em} = 556$  nm for **6**,  $\lambda_{em} = 557$  nm for **7**).

**Figure S33.** Time profiles of luminescence decay and exponential fit spectrum of **1** at 297 K ( $\lambda_{em} = 531$  nm).

**Figure S34.** Time profiles of luminescence decay and exponential fit spectrum of **2** at 297 K ( $\lambda_{em} = 555$  nm).

**Figure S35.** Time profiles of luminescence decay and exponential fit spectrum of **3** at 297 K ( $\lambda_{em} = 560$  nm).

**Figure S36.** Time profiles of luminescence decay and exponential fit spectrum of **4** at 297 K ( $\lambda_{em} = 535$  nm).

**Figure S37.** Time profiles of luminescence decay and exponential fit spectrum of **5** at 297 K ( $\lambda_{em} = 558$  nm).

**Figure S38.** Time profiles of luminescence decay and exponential fit spectrum of **6** at 297 K ( $\lambda_{em} = 556$  nm).

**Figure S39.** Time profiles of luminescence decay and exponential fit spectrum of **7** at 297 K ( $\lambda_{em} = 557$  nm).

**Figure S40.** Time profiles of luminescence decay and exponential fit spectrum of **1** at 77 K ( $\lambda_{em} = 548$  nm).

**Figure S41.** Time profiles of luminescence decay and exponential fit spectrum of **2** at 77 K ( $\lambda_{em} = 557$  nm).

**Figure S42.** Time profiles of luminescence decay and exponential fit spectrum of **3** at 77 K ( $\lambda_{em} = 547$  nm).

**Figure S43.** Time profiles of luminescence decay and exponential fit spectrum of **4** at 77 K ( $\lambda_{em} = 524$  nm).

**Figure S44.** Time profiles of luminescence decay and exponential fit spectrum of **5** at 77 K ( $\lambda_{em} = 547$  nm).

**Figure S45.** Time profiles of luminescence decay and exponential fit spectrum of **6** at 77 K ( $\lambda_{em} = 545$  nm).

**Figure S46.** Time profiles of luminescence decay and exponential fit spectrum of **7** at 77 K ( $\lambda_{em} = 546$  nm).

## 5. Computational details

**Figure S47.** Compositions of the frontier molecular orbitals at optimized  $S_0$  geometry

of complex 1.

**Figure S48.** Compositions of the frontier molecular orbitals at optimized  $S_0$  geometry of complex 2.

**Figure S49.** Compositions of the frontier molecular orbitals at optimized  $S_0$  geometry of complex 3.

**Figure S50.** Compositions of the frontier molecular orbitals at optimized  $S_0$  geometry of complex 4.

**Figure S51.** Compositions of the frontier molecular orbitals at optimized  $S_0$  geometry of complex 5.

**Figure S52.** Compositions of the frontier molecular orbitals at optimized  $S_0$  geometry of complex 6.

**Figure S53.** Compositions of the frontier molecular orbitals at optimized  $S_0$  geometry of complex 7.

**Figure S54.** Compositions of the frontier natural transition orbitals at optimized  $S_1$  geometry of complex 1.

**Figure S55.** Compositions of the frontier natural transition orbitals at optimized  $S_1$  geometry of complex 2.

**Figure S56.** Compositions of the frontier natural transition orbitals at optimized  $S_1$  geometry of complex 3.

**Figure S57.** Compositions of the frontier natural transition orbitals at optimized  $S_1$  geometry of complex 4.

**Figure S58.** Compositions of the frontier natural transition orbitals at optimized  $S_1$  geometry of complex 5.

**Figure S59.** Compositions of the frontier natural transition orbitals at optimized  $S_1$  geometry of complex 6.

**Figure S60.** Compositions of the frontier natural transition orbitals at optimized  $S_1$  geometry of complex 7.

**Figure S61.** Compositions of the frontier natural transition orbitals at optimized  $T_1$  geometry of complex 1.

**Figure S62.** Compositions of the frontier natural transition orbitals at optimized  $T_1$  geometry of complex 2.

**Figure S63.** Compositions of the frontier natural transition orbitals at optimized  $T_1$  geometry of complex 3.

**Figure S64.** Compositions of the frontier natural transition orbitals at optimized  $T_1$

geometry of complex **4**.

**Figure S65.** Compositions of the frontier natural transition orbitals at optimized  $T_1$  geometry of complex **5**.

**Figure S66.** Compositions of the frontier natural transition orbitals at optimized  $T_1$  geometry of complex **6**.

**Figure S67.** Compositions of the frontier natural transition orbitals at optimized  $T_1$  geometry of complex **7**.

**Figure S68.** The core structures in the optimized  $S_0$ ,  $S_1$ , and  $T_1$  geometries for complexes **1–7**.

**Table S1.** Crystallographic data and details for complexes **1–7**.

**Table S2.** Computed excitation states for complex **1** in  $\text{CH}_2\text{Cl}_2$ .

**Table S3.** Computed excitation states for complex **2** in  $\text{CH}_2\text{Cl}_2$ .

**Table S4.** Computed excitation states for complex **3** in  $\text{CH}_2\text{Cl}_2$ .

**Table S5.** Computed excitation states for complex **4** in  $\text{CH}_2\text{Cl}_2$ .

**Table S6.** Computed excitation states for complex **5** in  $\text{CH}_2\text{Cl}_2$ .

**Table S7.** Computed excitation states for complex **6** in  $\text{CH}_2\text{Cl}_2$ .

**Table S8.** Computed excitation states for complex **7** in  $\text{CH}_2\text{Cl}_2$ .

## 6. References

## 1. General information

All chemicals were purchased from commercial sources and used without being processed unless specified. Triphenylphosphine (PPh<sub>3</sub>) was purchased from Energy Chemical Co. 1,2-bis(9-carbazolyl)-4,5-bis(diphenylphosphino)benzene (**DCzDP**) and 3-(diphenylphosphino)-9-methylcarbazole (**CzP**) were synthesized according to the literature methods.<sup>1,2</sup> Tetrahydrofuran (THF) was distilled under nitrogen in the presence of sodium chips with benzophenone as the indicator before use.

*Instrumentation.* <sup>1</sup>H, <sup>13</sup>C and <sup>31</sup>P NMR spectra were recorded on a Varian 400 MHz NMR spectrometer using deuterated solvents as the lock. Chemical shifts were reported in ppm relative to SiMe<sub>4</sub> for the <sup>1</sup>H, CDCl<sub>3</sub> for the <sup>13</sup>C, and 85% H<sub>3</sub>PO<sub>4</sub> for the <sup>31</sup>P nucleus. High resolution mass spectra (HRMS) were recorded on the Thermo Scientific Exactive Plus equipped with ESI ionization source. The elemental composition was determined with SEM/EDS (Hitachi SU-800 FE-SEM). UV-vis absorption was recorded by a Unicam Helios  $\alpha$  spectrometer. Emission spectra and lifetimes of the complexes were measured using Edinburgh instrument FLS980 steady-state and time resolved fluorescence spectrometer (375 nm variable pulsed diode laser, repetition frequencies 1000 Hz, and optical pulse period 100 ns). Solid-state  $\Phi_{\text{PL}}$  values were determined using a Hamamatsu system for absolute PL quantum yield measurements equipped with an integrating sphere with Spectralon inner surface coating.

*X-ray crystallography.* Crystals of complexes **1–7** suitable for X-ray diffraction studies were grown by slow evaporation of CH<sub>2</sub>Cl<sub>2</sub>/*n*-hexane for **1–3**, CH<sub>2</sub>Cl<sub>2</sub>/CH<sub>3</sub>CN for **4–6**, CH<sub>2</sub>Cl<sub>2</sub>/C<sub>2</sub>H<sub>5</sub>OH for **7** at room temperature. Geometric and intensity data were collected using Cu K $\alpha$  radiation ( $\lambda = 1.54184 \text{ \AA}$ ) on a XtaLAB Synergy,

Dualflex, HyPix area detector. The collected frames were processed with the software *SAINTE*<sup>3</sup>, and an absorption correction was applied (*SADABS*)<sup>4</sup> to the collected reflections. The structures were solved by direct methods (*SHELXTL*)<sup>5</sup> in conjunction with standard difference Fourier techniques and subsequently refined by full-matrix least-squares analyses on  $F^2$ . All non-hydrogen atoms were assigned with anisotropic displacement parameters.

*Theoretical calculations.* The structural parameters for complexes **1–7** were obtained from the crystal data which are listed in Tables 1 and S1. The corresponding ground-state ( $S_0$ ) geometries were all optimized at theoretical level of B3LYP-D3(BJ)/6-311+G(d,p) (LANL2D2 for Cu and I atoms), where D3(BJ) was Grimme's D3 dispersion correction with Becke-Jonson damping. To calculate the adiabatic excitation energies, the optimized geometries of  $S_1$  and  $T_1$  are required, which were obtained at theoretical levels of TD-B3LYP-D3(BJ)/6-31+G(d) and UB3LYP-D3(BJ)/6-311+G(d,p) (LANL2D2 for Cu and I atoms), respectively. The absorption spectra based on the optimized  $S_0$  geometries were obtained at the TD-B3LYP-D3(BJ)/6-311+G(d,p) (LANL2D2 for Cu and I atoms) level. In addition, the solvent effects were taken into account by the polarizable continuum model (PCM, solvent = dichloromethane) for the purpose of comparing with the experimental spectra. All the calculations were manipulated by the Gaussian 16 suite.<sup>6</sup> The compositions of the frontier molecular and natural transition orbitals at optimized  $S_0$ ,  $S_1$  and  $T_1$  geometries of complex **1–7** were calculated by the Multiwfn program.<sup>7,8</sup>

*Device fabrication.* The pre-cleaned ITO glass substrates were treated with ozone for 20 min. Then, hole-injection layer of the PEDOT:PSS was spin-coated and cured at 120 °C for 30 min in the air. The emission layer was obtained by spin-coating a chloroform solution of complex **4** (x wt%) in 26DCzppy and TCTA (6:4) at different doping levels. After drying in a vacuum oven at 60 °C for 10 min, DPEPO, TmPyPB, LiF, and Al cathode were successively evaporated on the emission layer at a base pressure less than  $10^{-6}$  Torr. The EL spectra were recorded with a PR650 spectra colorimeter. The J–V–L curves of the devices were measured by a Keithley 2400/2000 source meter. All the experiments and measurements were carried out under ambient conditions.



## 2. NMR and mass spectra

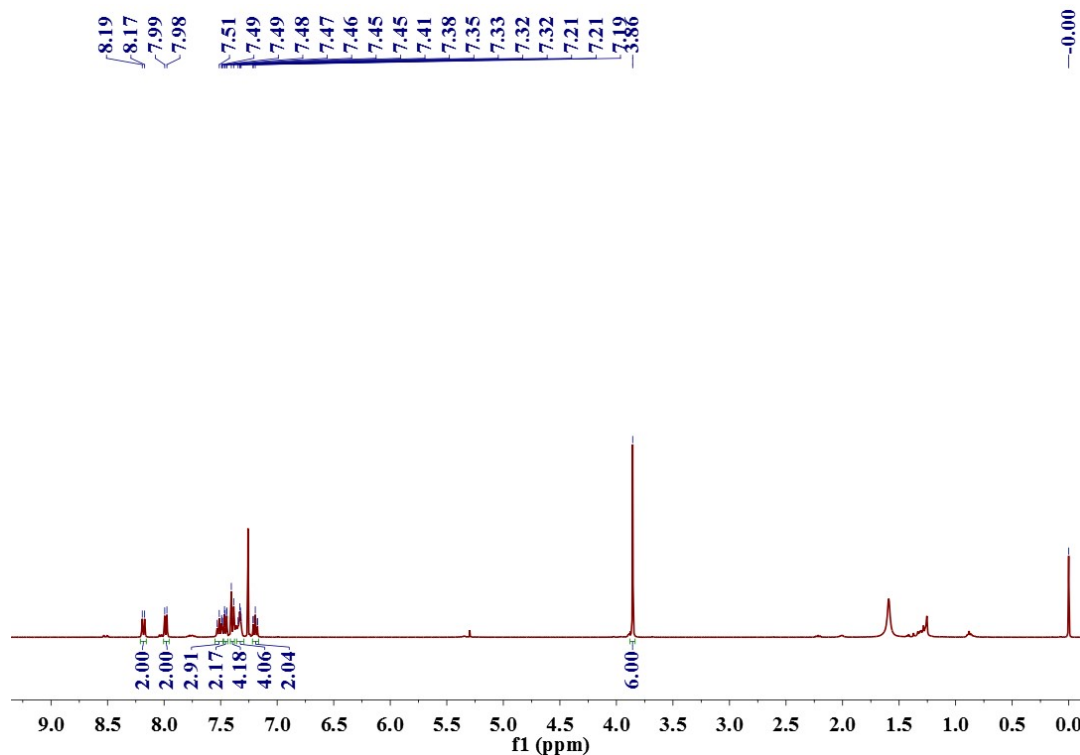

Figure S1.  $^1\text{H}$  NMR spectrum of DCzP in  $\text{CDCl}_3$ .

$\delta = 5.30$  (dichloromethane), 1.56 ( $\text{H}_2\text{O}$ ), 0.88 and 1.26 (petroleum ether or hexane)

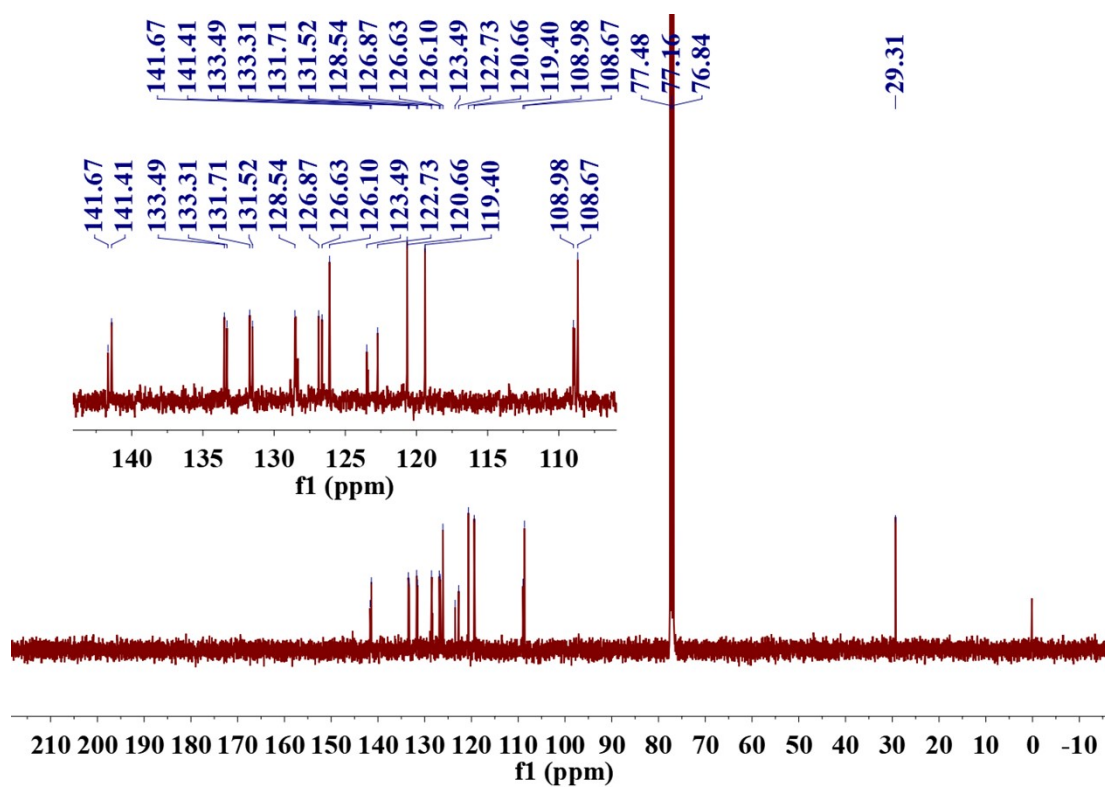

Figure S2.  $^{13}\text{C}$  NMR spectrum of DCzP in  $\text{CDCl}_3$ .

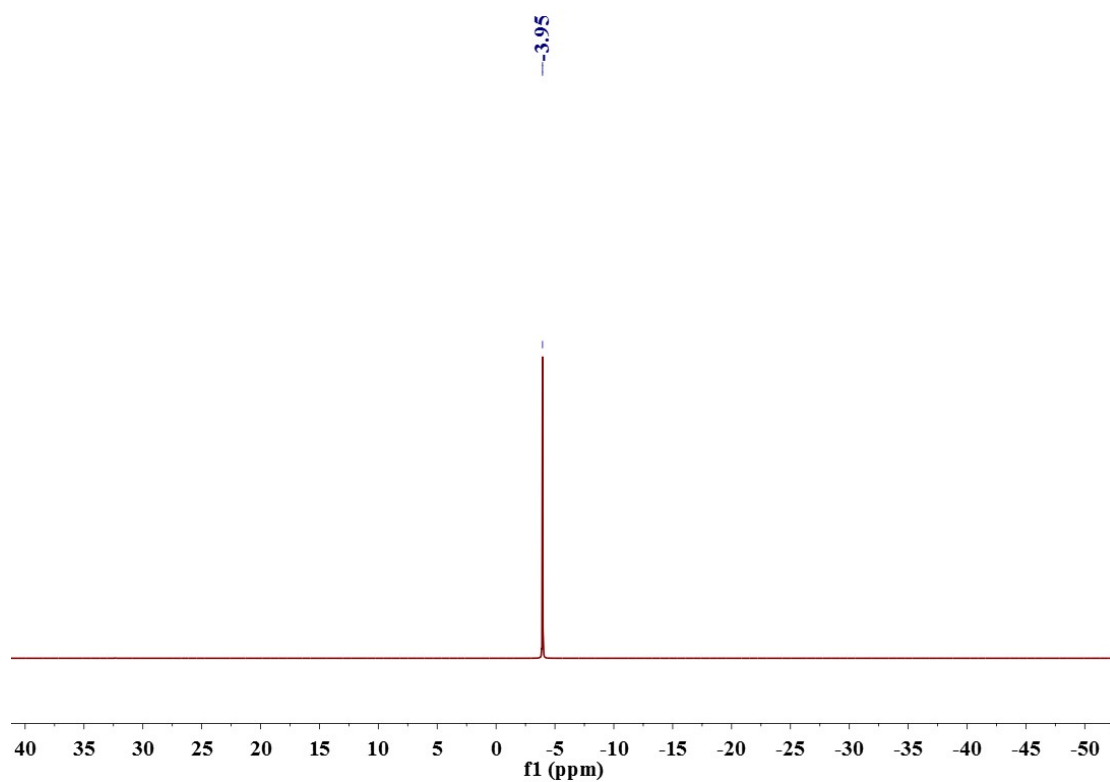

Figure S3. <sup>31</sup>P NMR spectrum of DCzP in CDCl<sub>3</sub>.

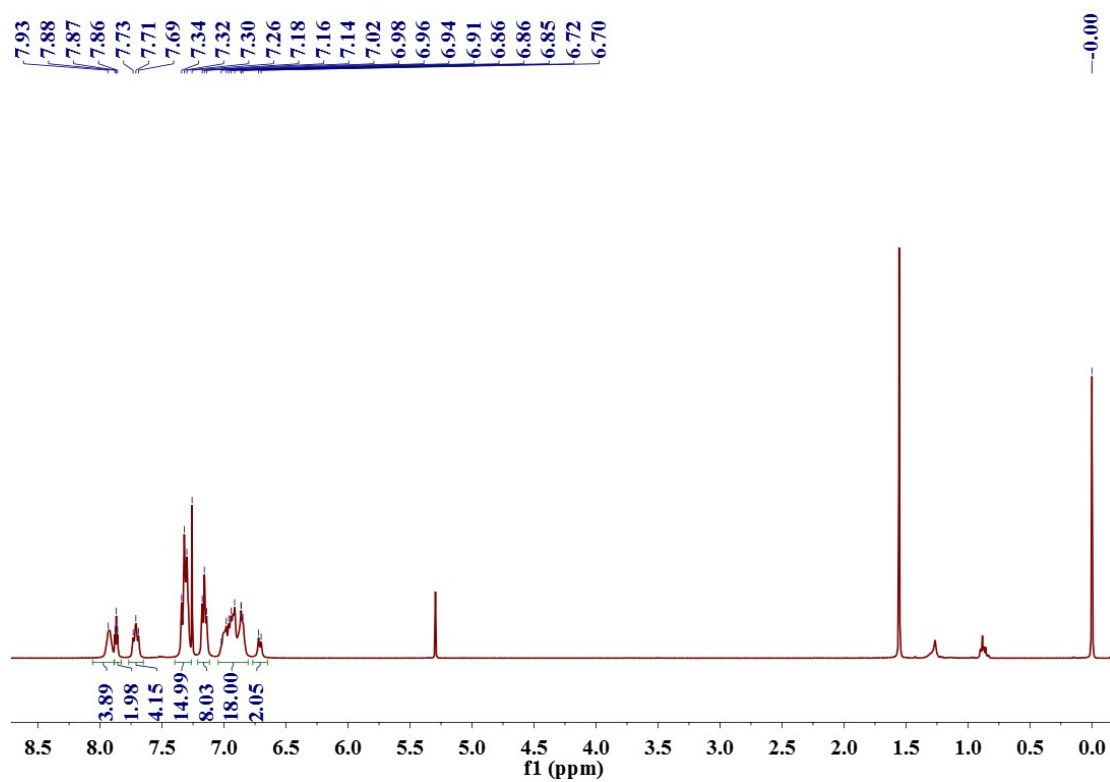

Figure S4. <sup>1</sup>H NMR spectrum of **1** in CDCl<sub>3</sub>.

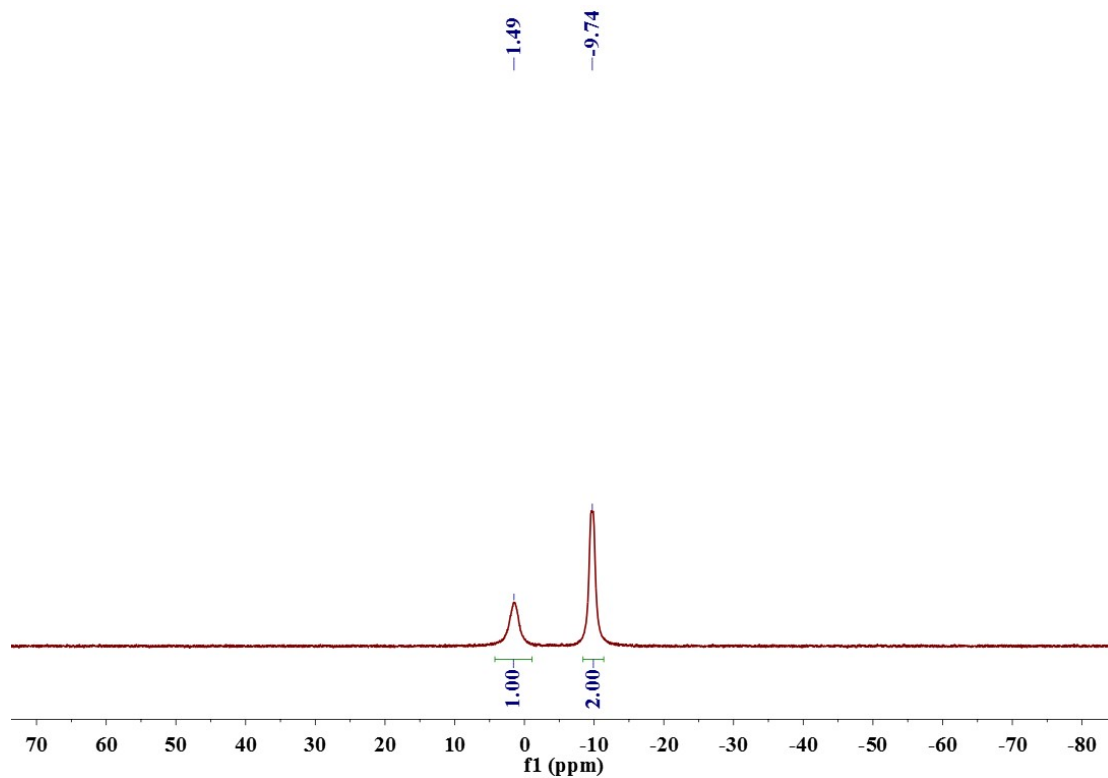

Figure S5.  $^{31}\text{P}$  NMR spectrum of **1** in  $\text{CDCl}_3$ .

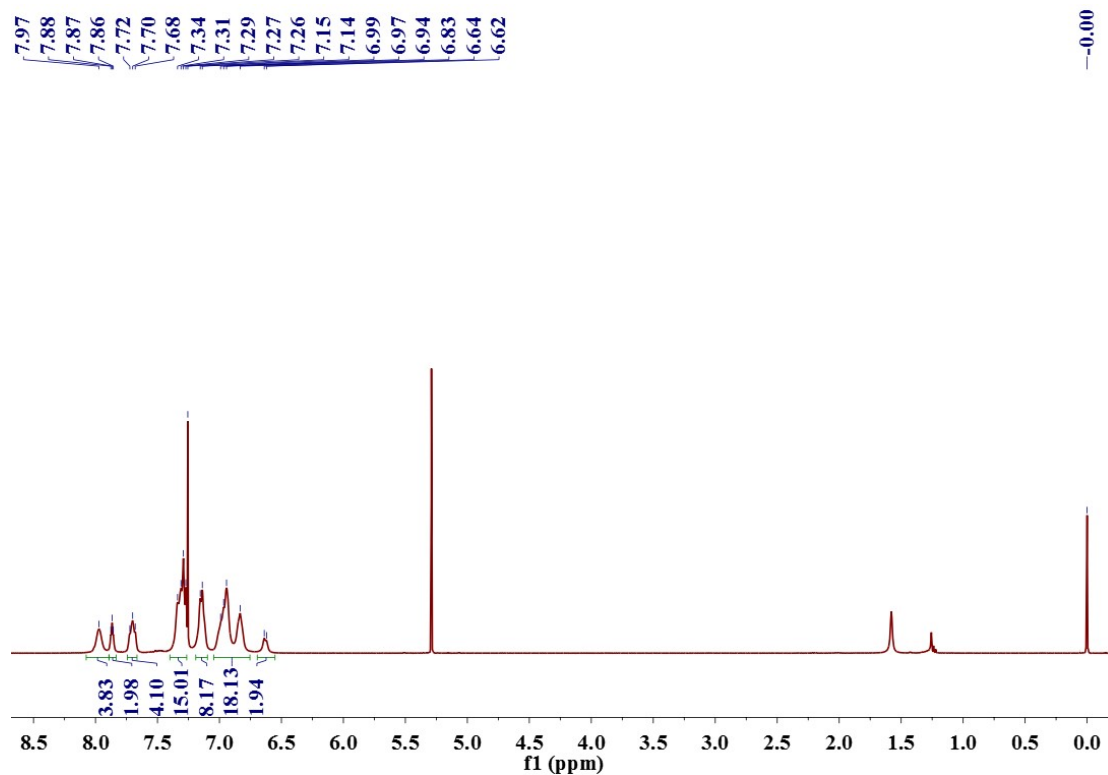

Figure S6.  $^1\text{H}$  NMR spectrum of **2** in  $\text{CDCl}_3$ .

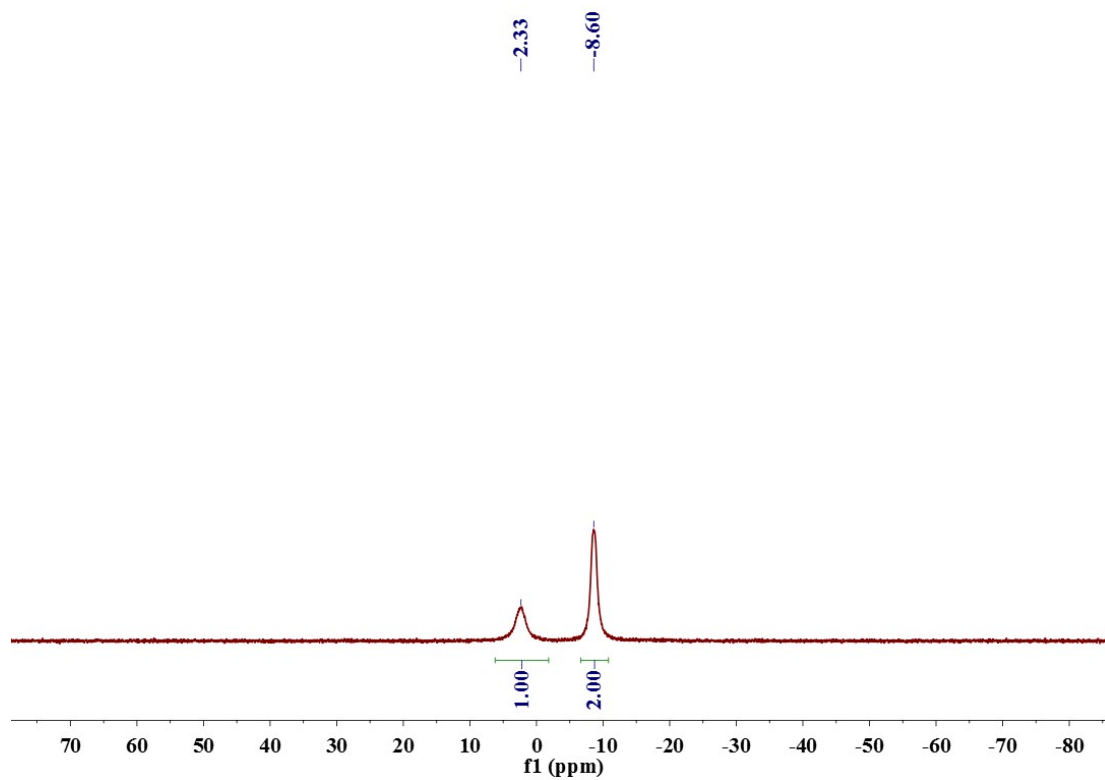

Figure S7. <sup>31</sup>P NMR spectrum of **2** in CDCl<sub>3</sub>.

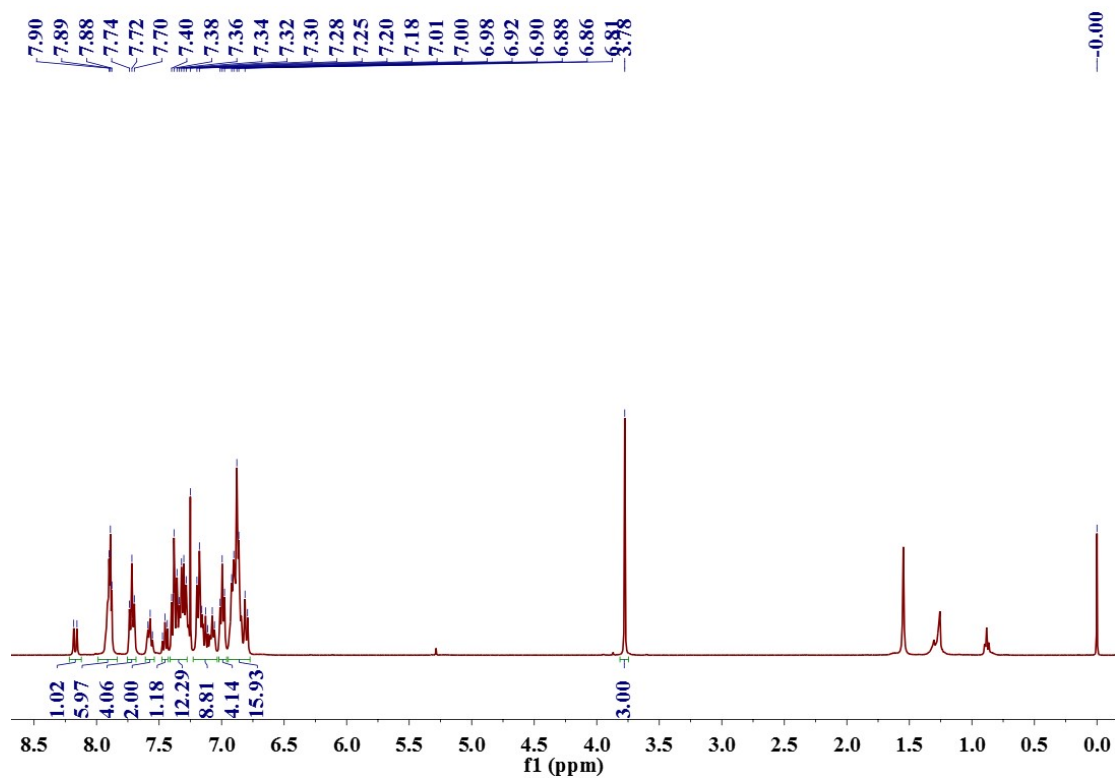

Figure S8. <sup>1</sup>H NMR spectrum of **3** in CDCl<sub>3</sub>.

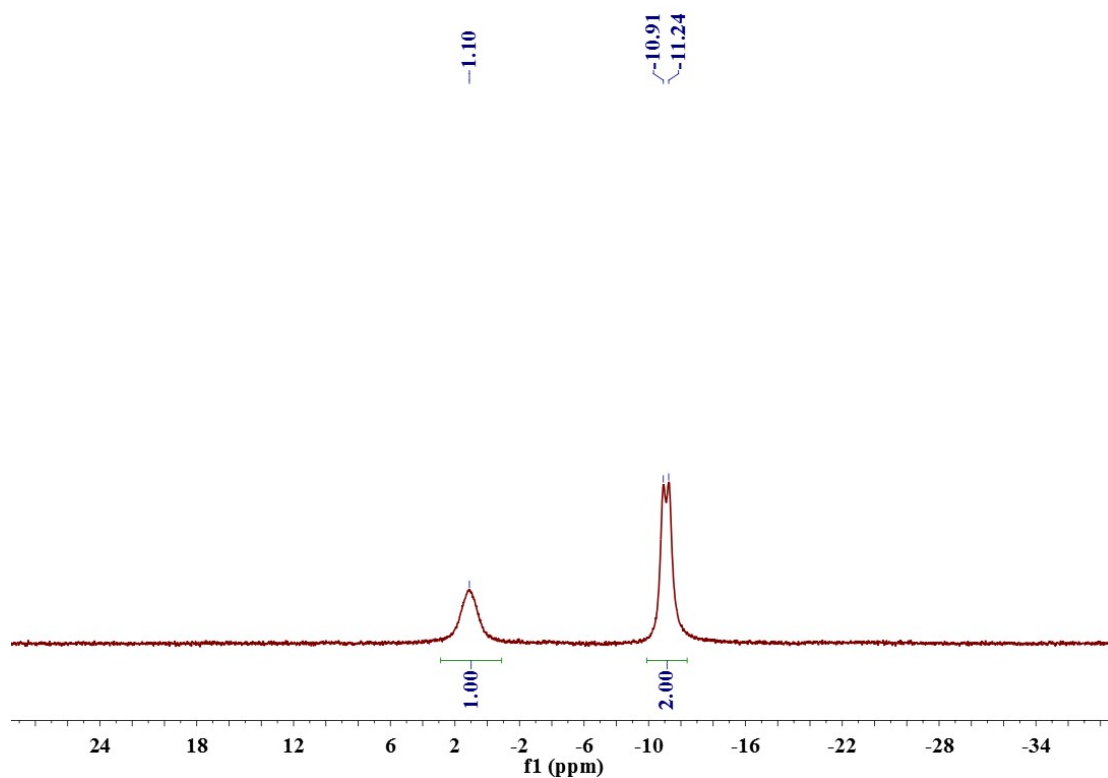

Figure S9. <sup>31</sup>P NMR spectrum of **3** in CDCl<sub>3</sub>.

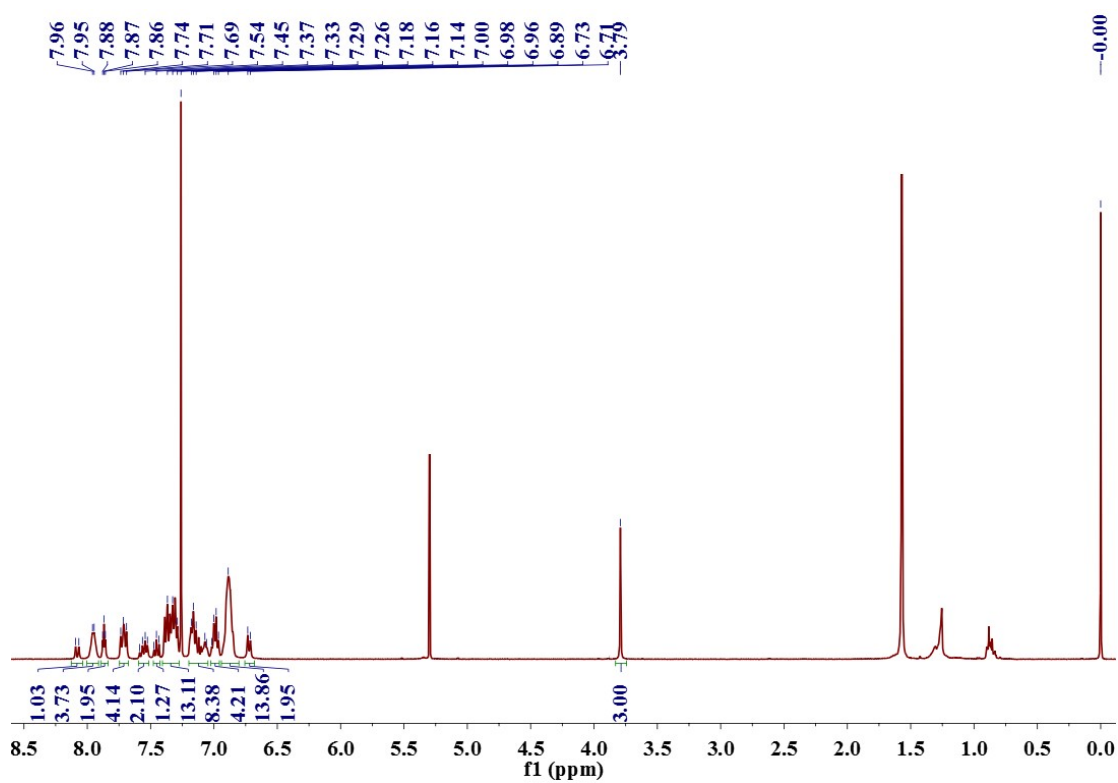

Figure S10. <sup>1</sup>H NMR spectrum of **4** in CDCl<sub>3</sub>.

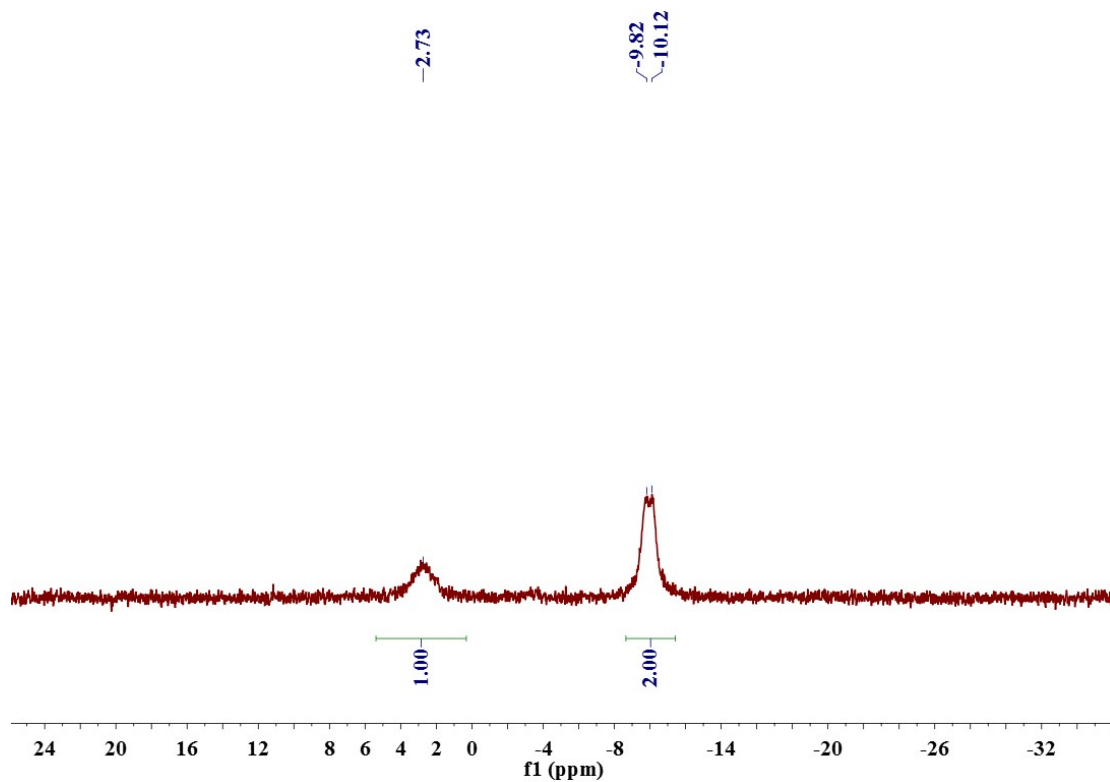

Figure S11.  $^{31}\text{P}$  NMR spectrum of **4** in  $\text{CDCl}_3$ .

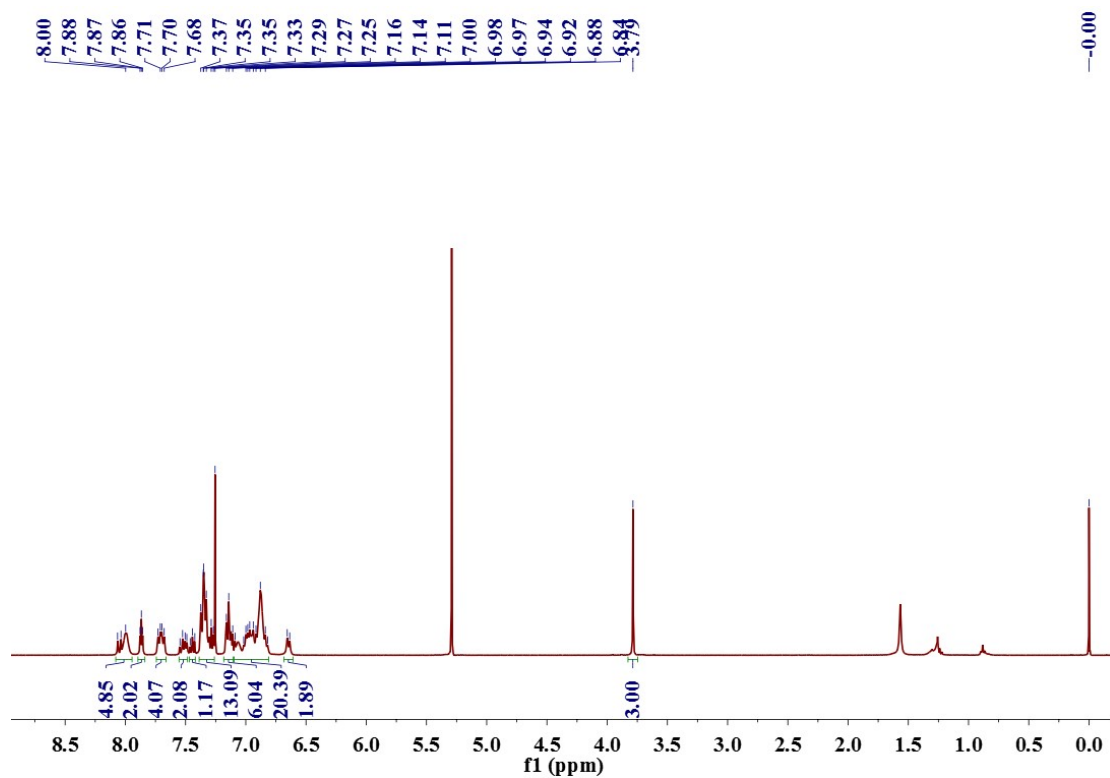

Figure S12.  $^1\text{H}$  NMR spectrum of **5** in  $\text{CDCl}_3$ .

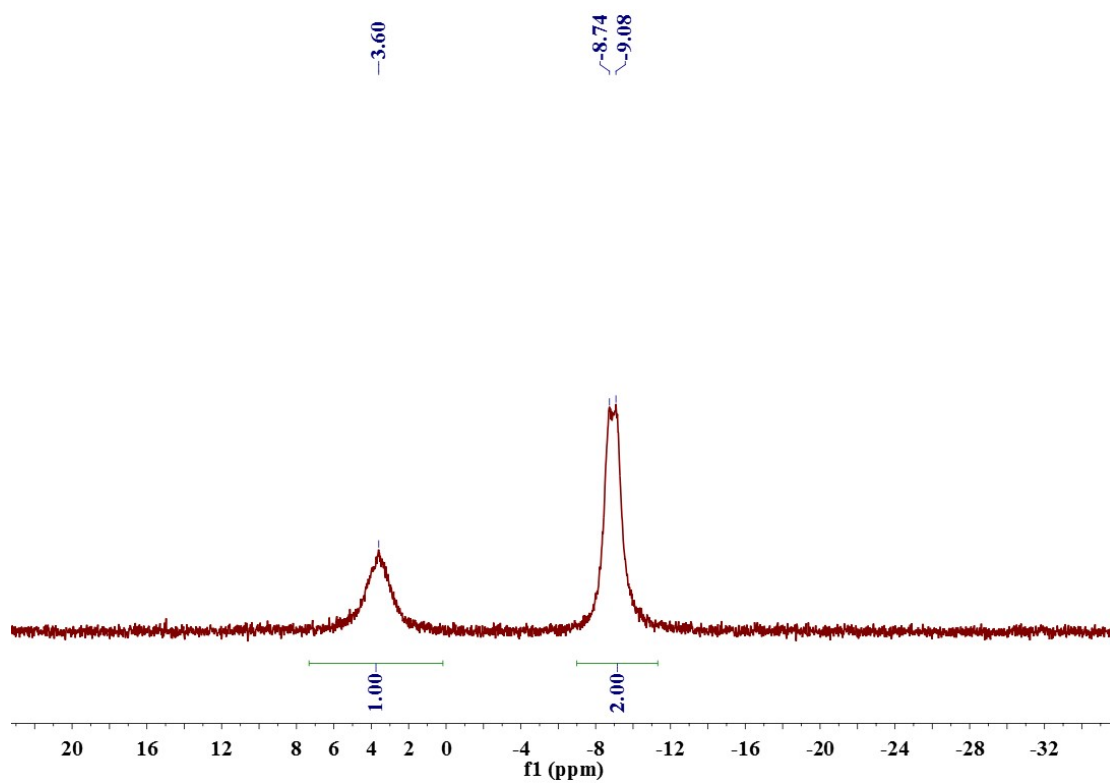

Figure S13.  $^{31}\text{P}$  NMR spectrum of **5** in  $\text{CDCl}_3$ .

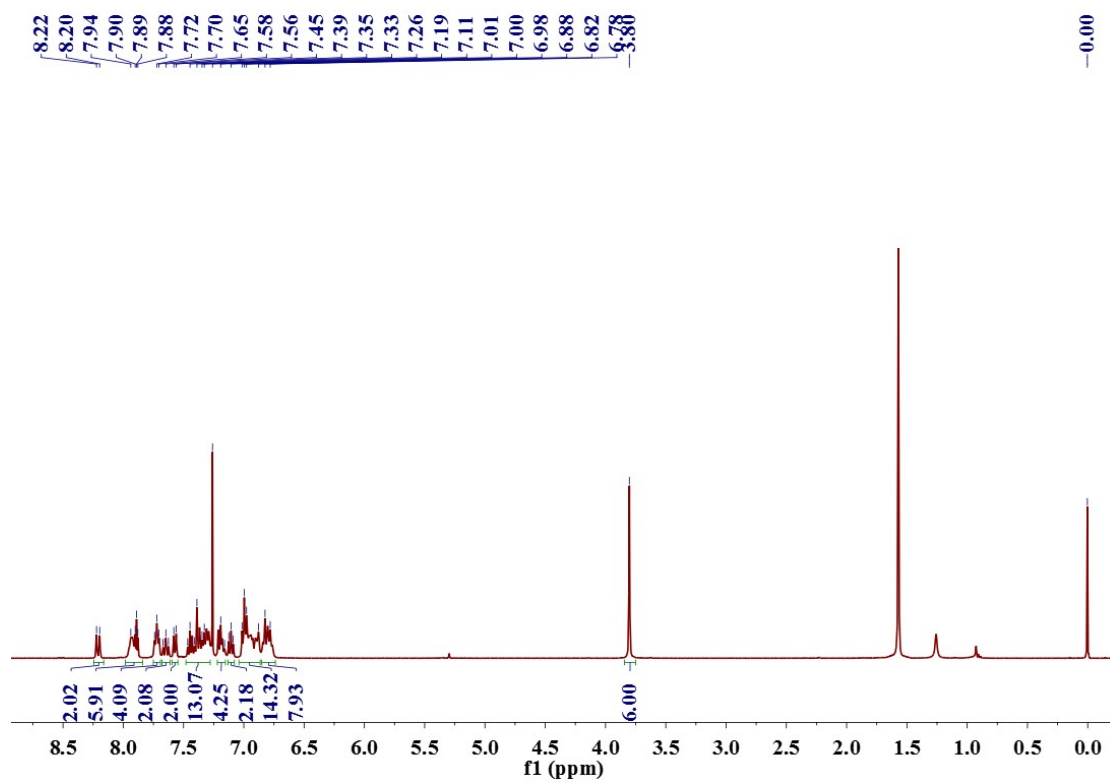

Figure S14.  $^1\text{H}$  NMR spectrum of **6** in  $\text{CDCl}_3$ .

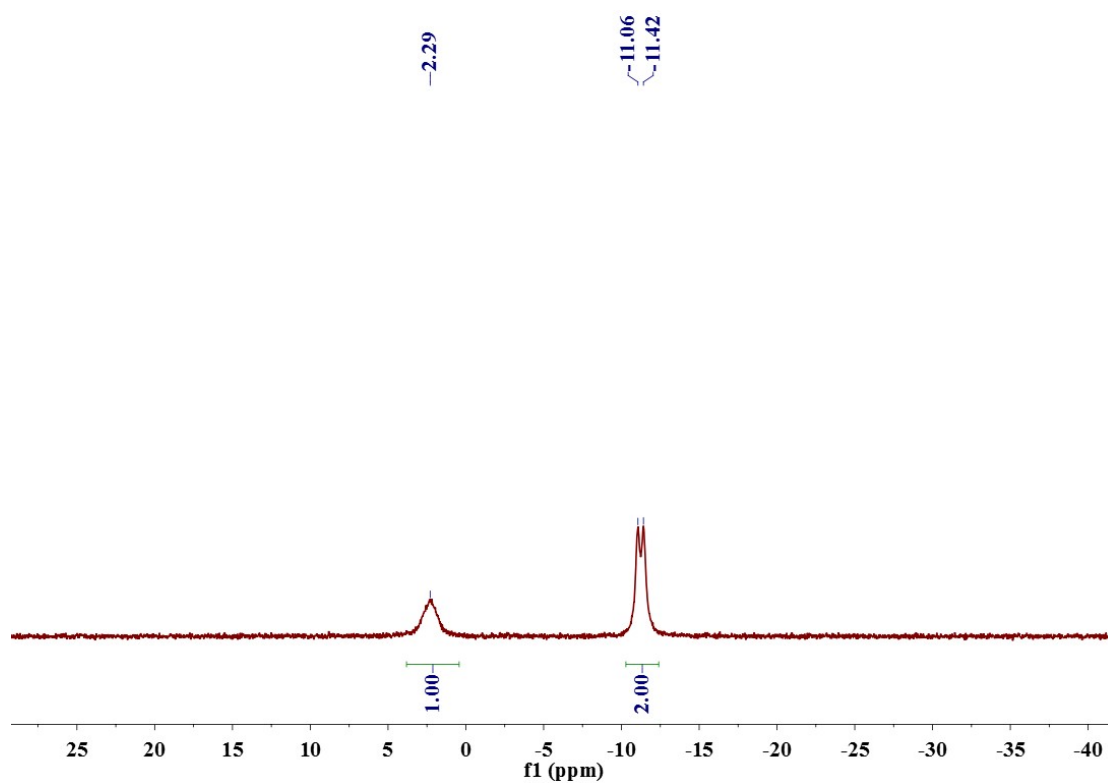

Figure S15.  $^{31}\text{P}$  NMR spectrum of **6** in  $\text{CDCl}_3$ .

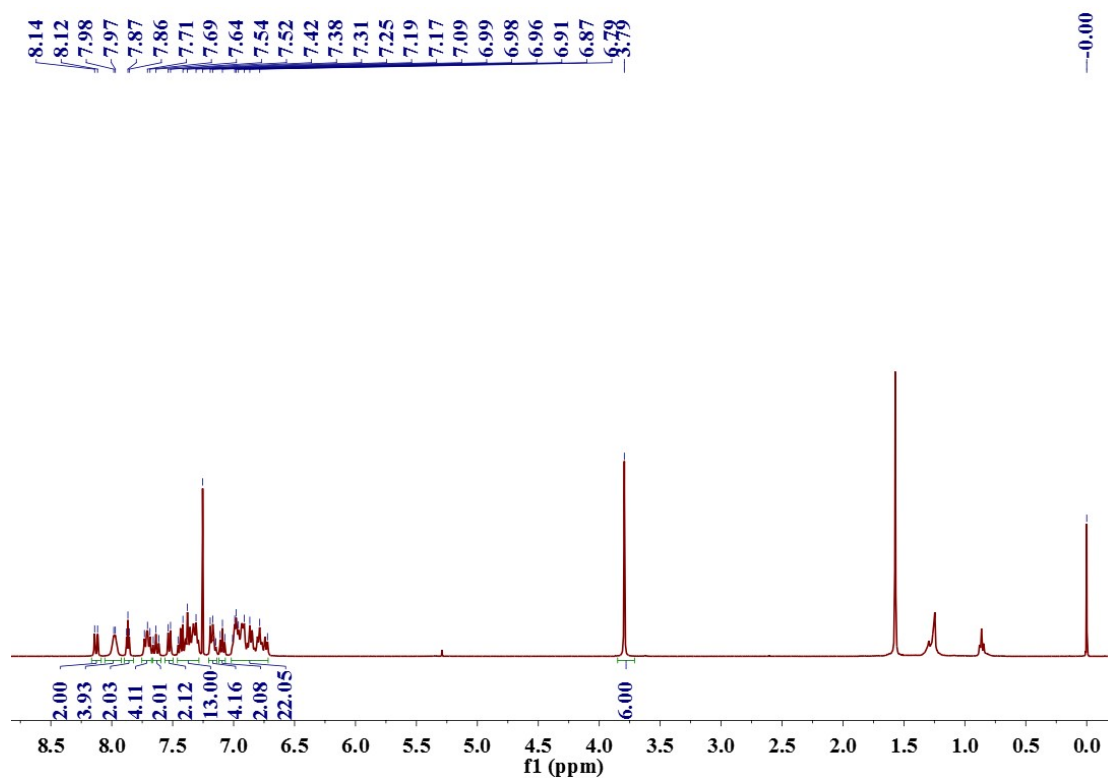

Figure S16.  $^1\text{H}$  NMR spectrum of **7** in  $\text{CDCl}_3$ .



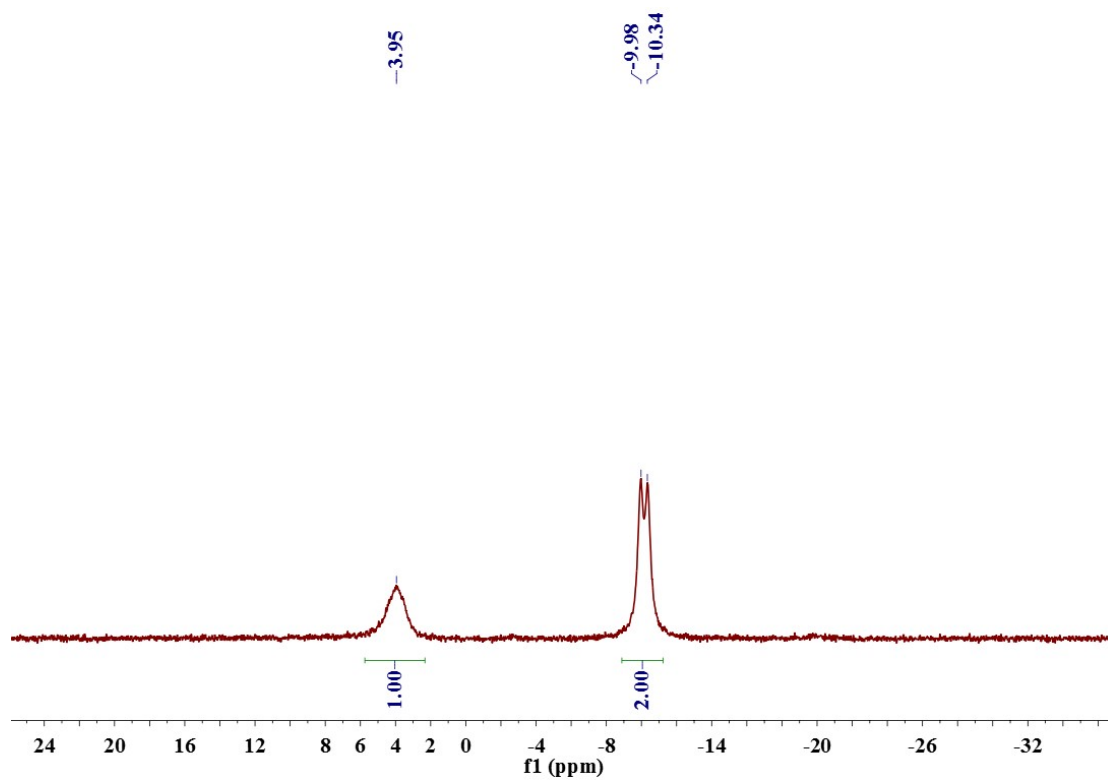

**Figure S17.**  $^{31}\text{P}$  NMR spectrum of **7** in  $\text{CDCl}_3$ .

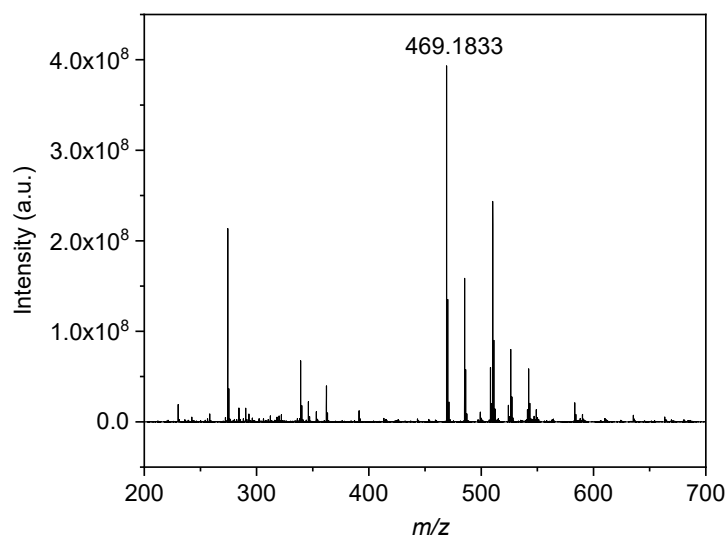

**Figure S18.** Mass spectrum of **DCzP**.

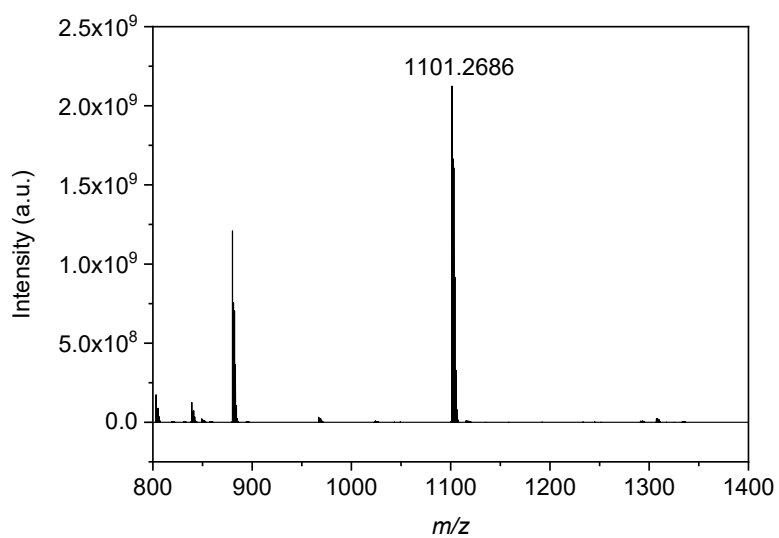

**Figure S19.** Mass spectrum of 1.

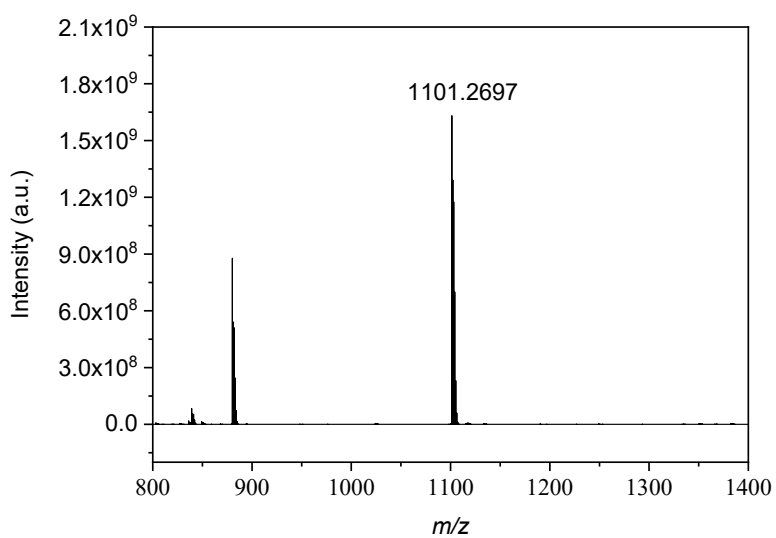

**Figure S20.** Mass spectrum of 2.

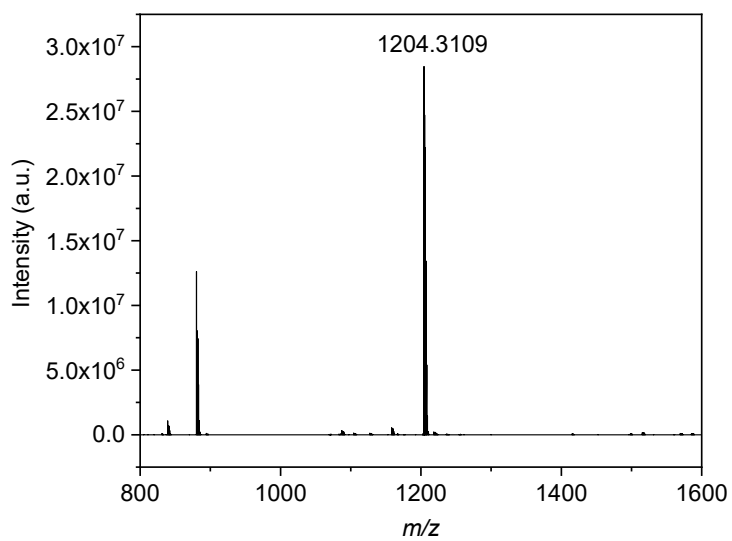

**Figure S21.** Mass spectrum of 3.

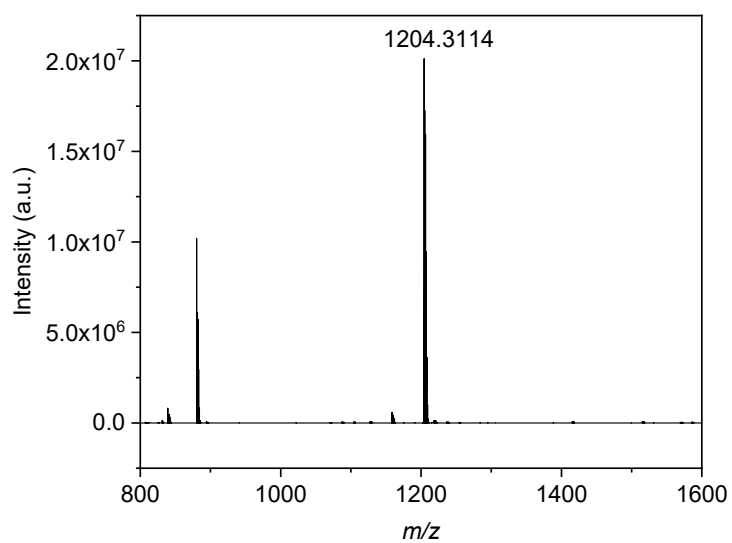

**Figure S22.** Mass spectrum of 4.

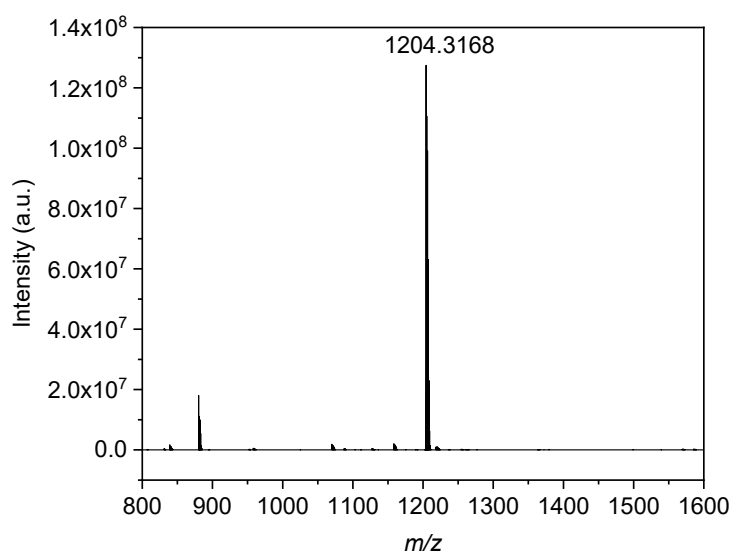

**Figure S23.** Mass spectrum of 5.

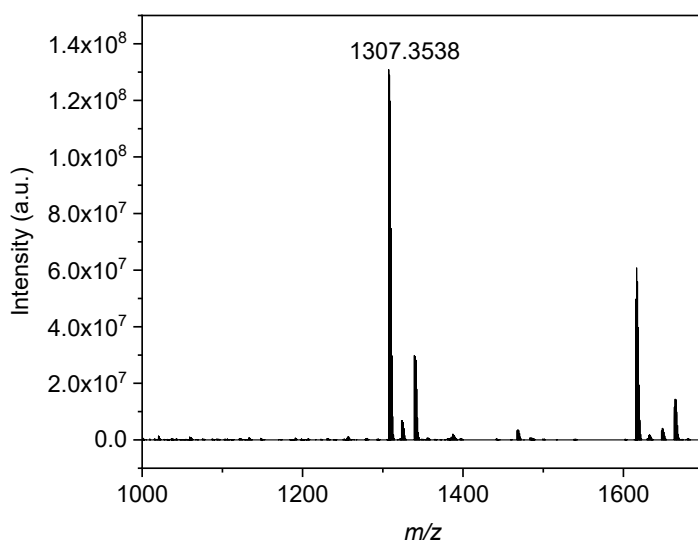

**Figure S24.** Mass spectrum of 6.

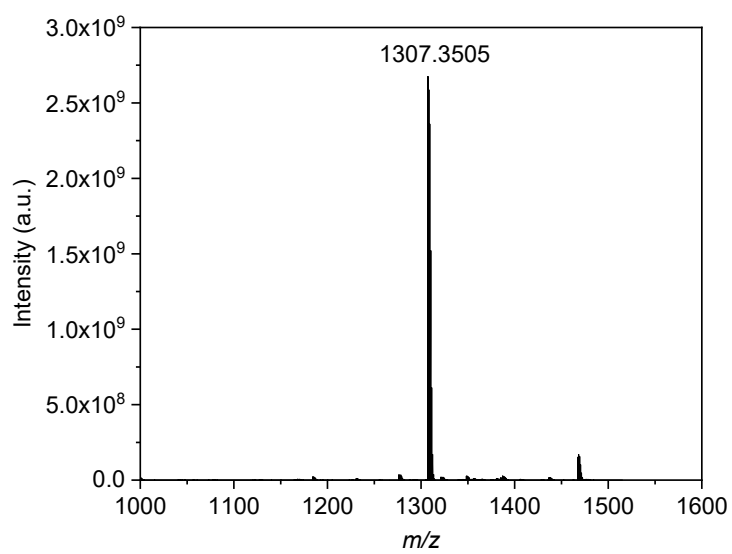

**Figure S25.** Mass spectrum of **7**.

### 3. Molecular structures

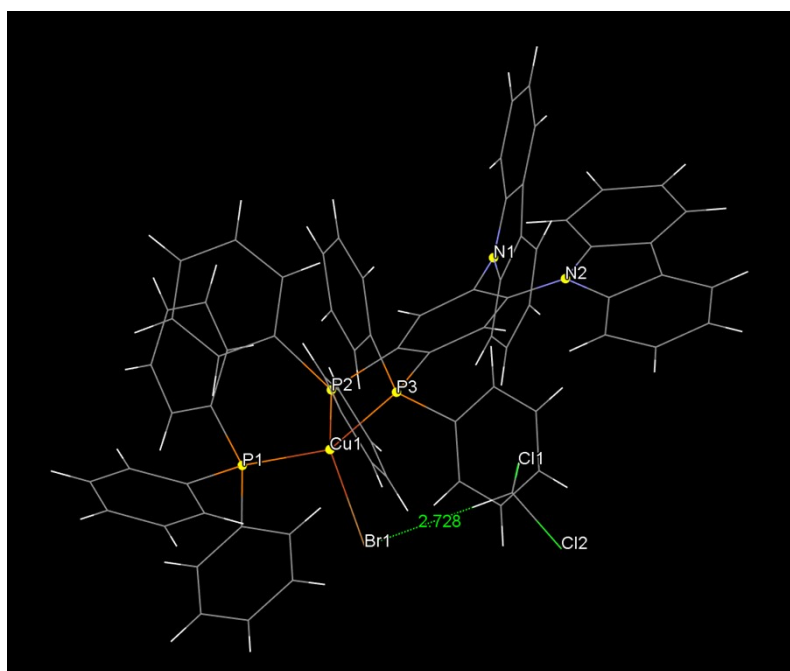

**Figure S26.** Intermolecular Br $\cdots$ H (CH<sub>2</sub>Cl<sub>2</sub>) interaction in **1**.

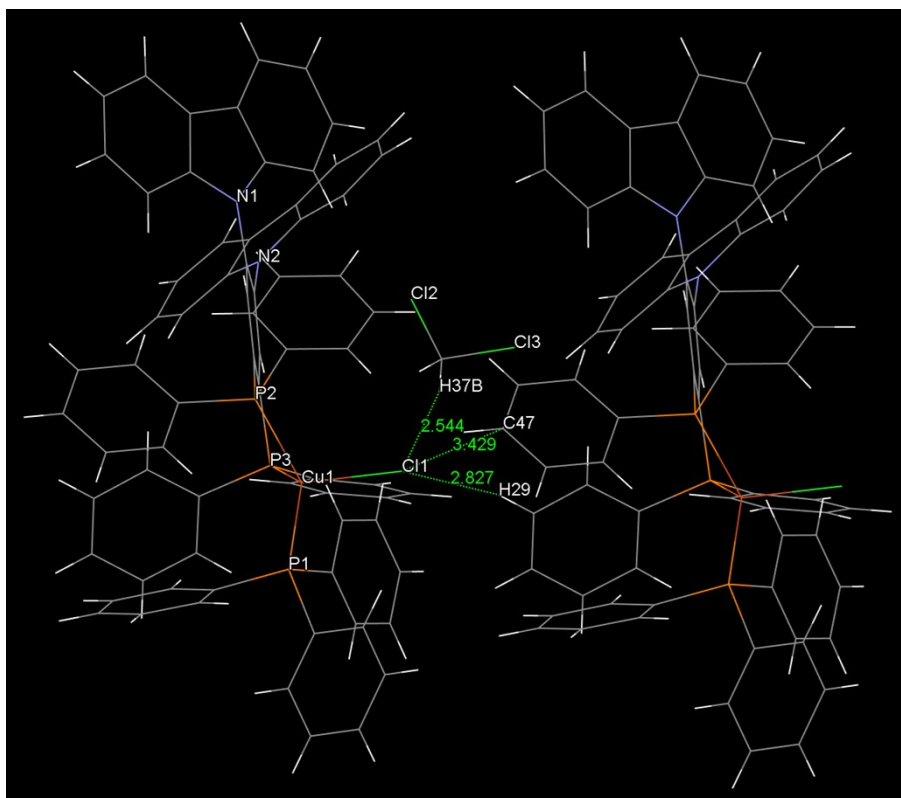

**Figure S27.** Intermolecular Cl $\cdots$ H (CH<sub>2</sub>Cl<sub>2</sub>), Cl $\cdots$ H (phenyl) and Cl $\cdots$ C (phenyl) interactions in **2**.

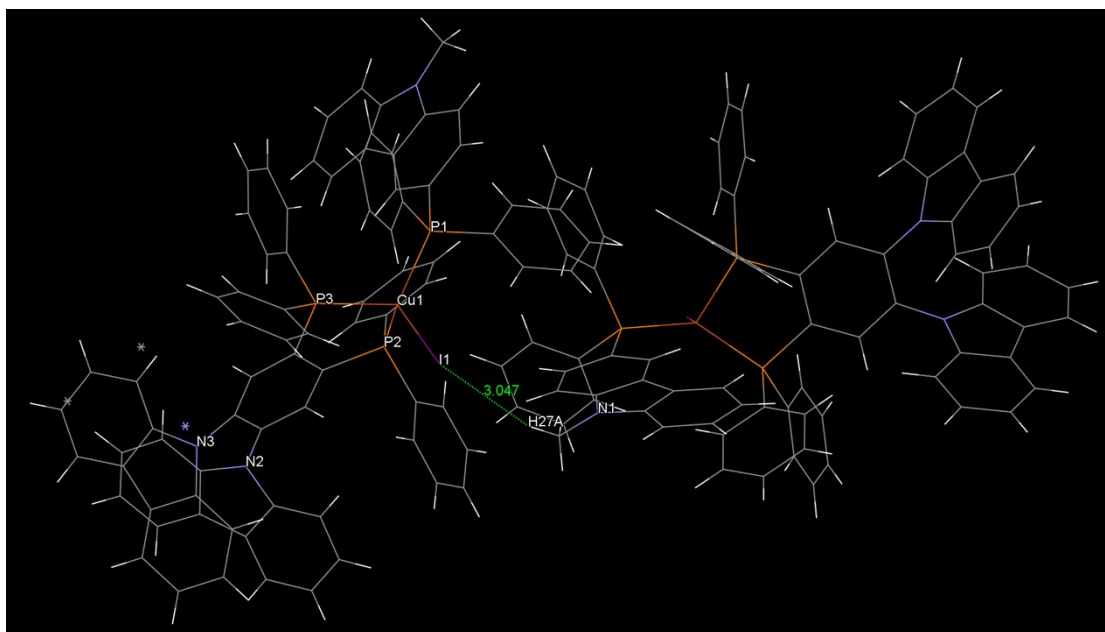

**Figure S28.** Intermolecular I $\cdots$ H (CH<sub>3</sub>) interaction in **3**.

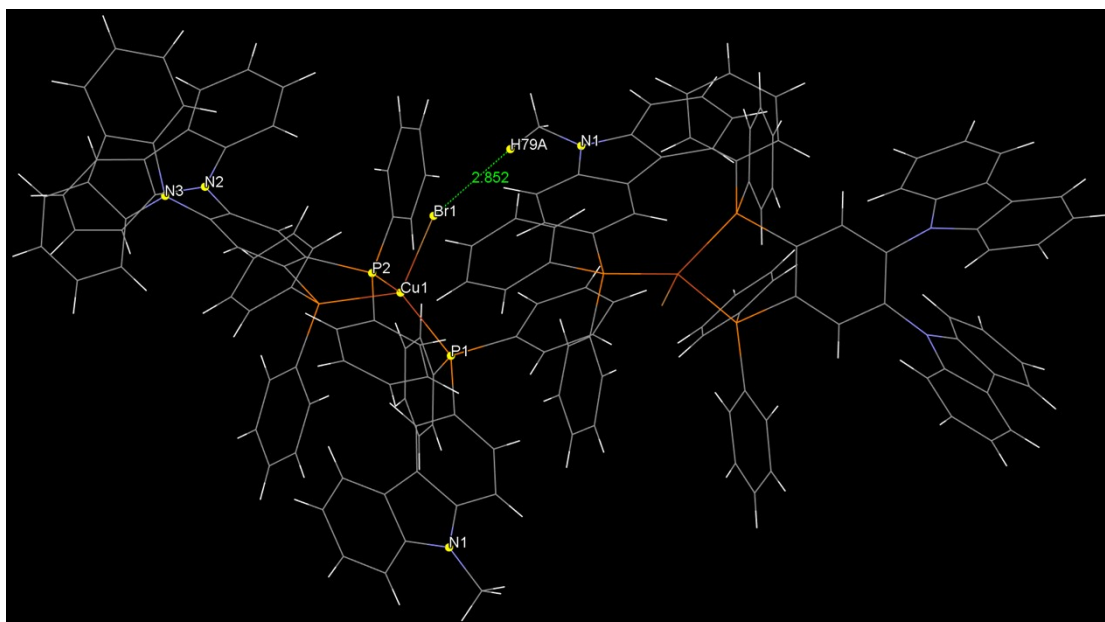

**Figure S29.** Intermolecular Br $\cdots$ H (CH<sub>3</sub>) interaction in **4**.

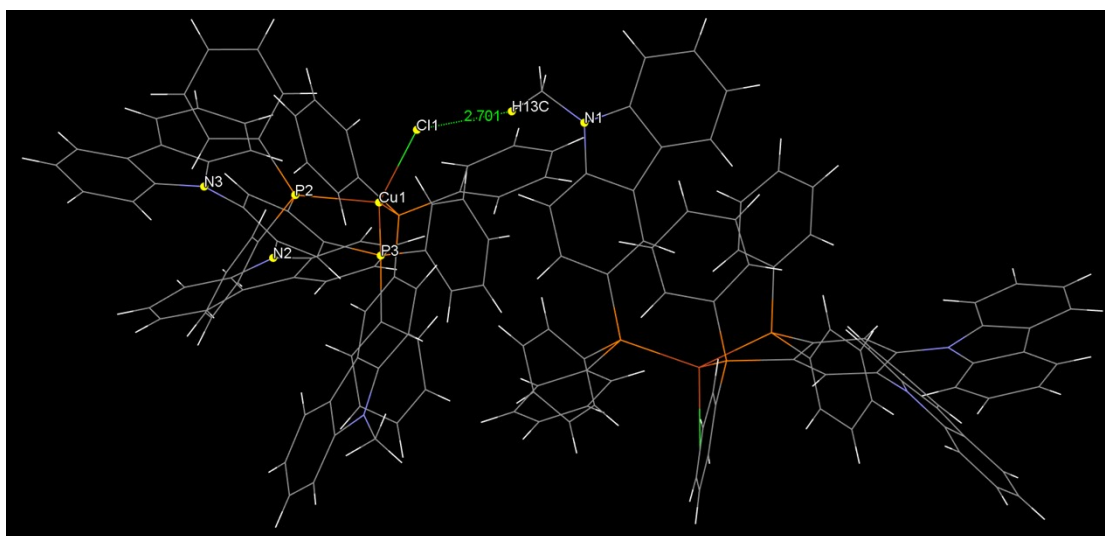

**Figure S30.** Intermolecular Cl $\cdots$ H (CH<sub>3</sub>) interaction in **5**.

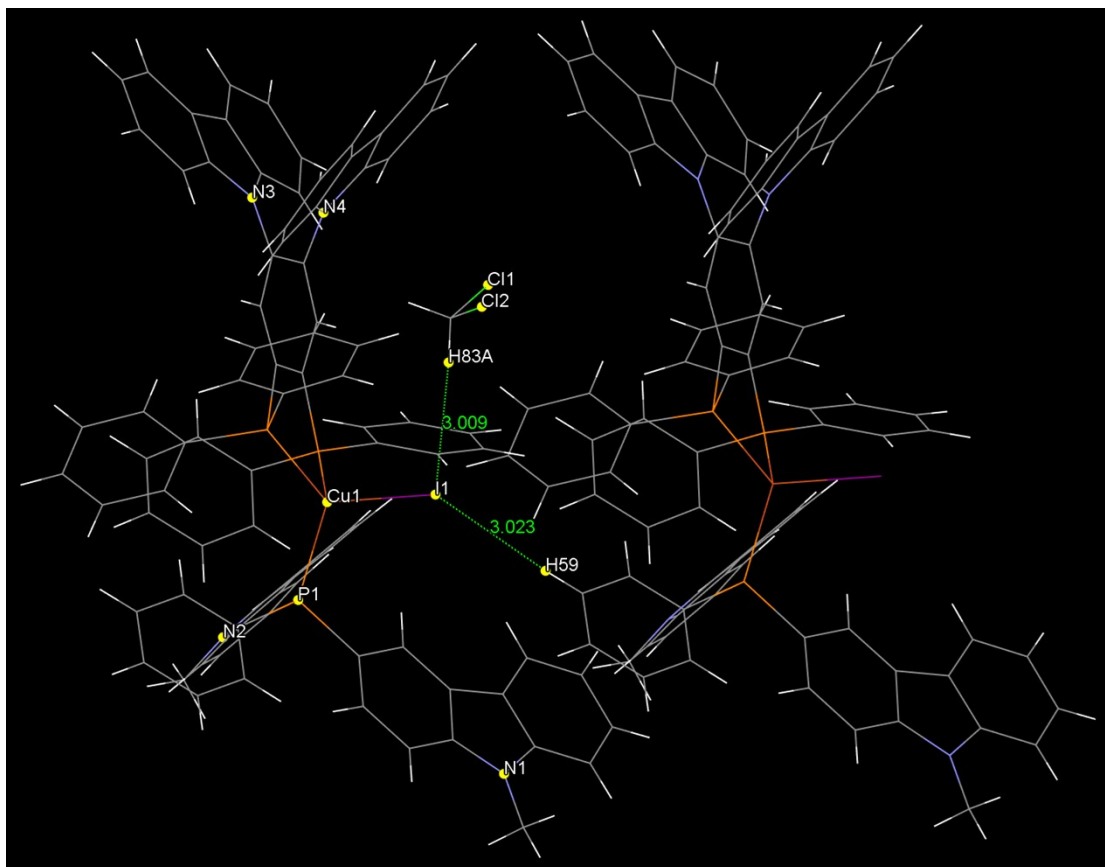

**Figure S31.** Intermolecular I···H (phenyl), I···H (CH<sub>2</sub>Cl<sub>2</sub>) interactions in **6**.

#### 4. Photophysical properties

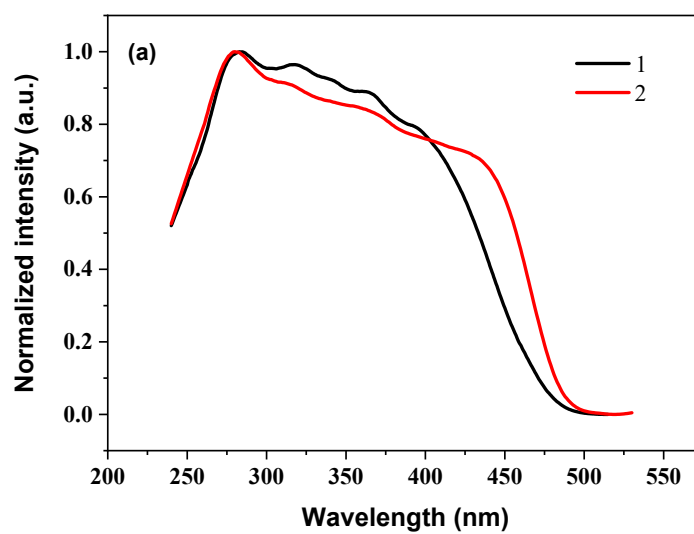



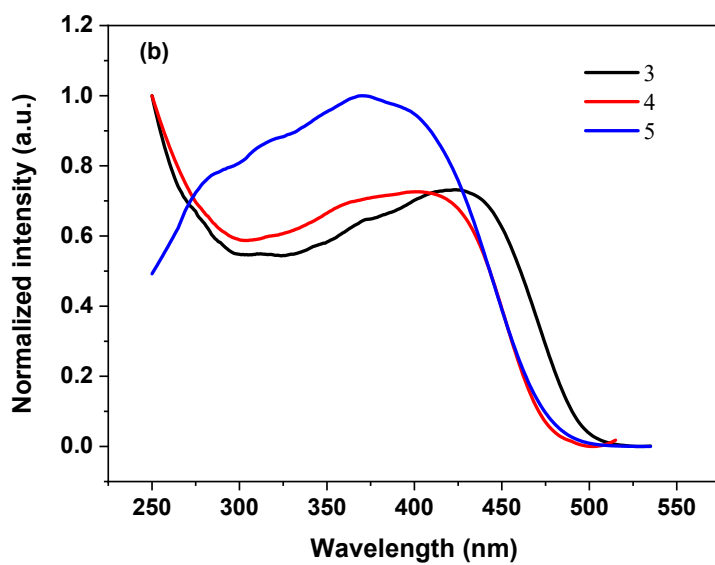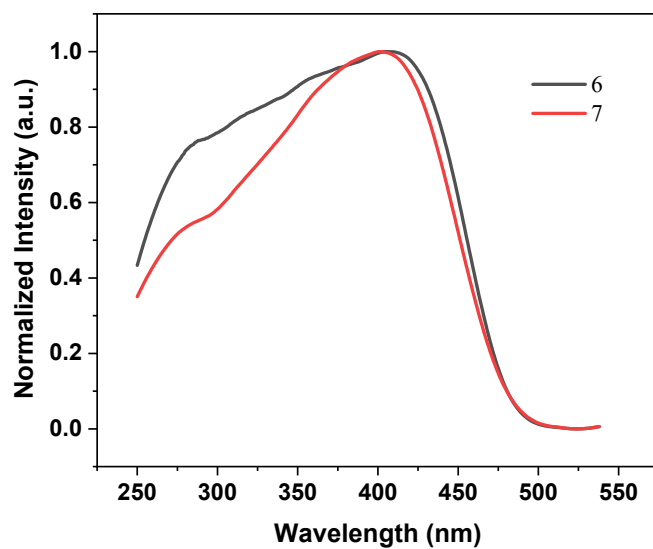

**Figure S32.** Normalized excitation spectra of **1–7** in powder at 297 K ( $\lambda_{em} = 531$  nm for **1**,  $\lambda_{em} = 555$  nm for **2**,  $\lambda_{em} = 560$  nm for **3**,  $\lambda_{em} = 535$  nm for **4**,  $\lambda_{em} = 558$  nm for **5**,  $\lambda_{em} = 556$  nm for **6**,  $\lambda_{em} = 557$  nm for **7**).

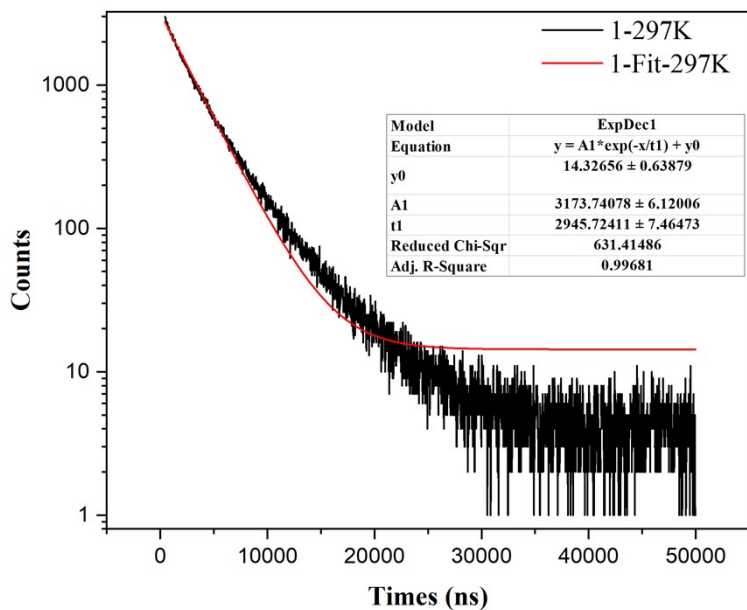

**Figure 33.** Time profiles of luminescence decay and exponential fit spectrum of **1** at 297 K ( $\lambda_{em} = 531$  nm).

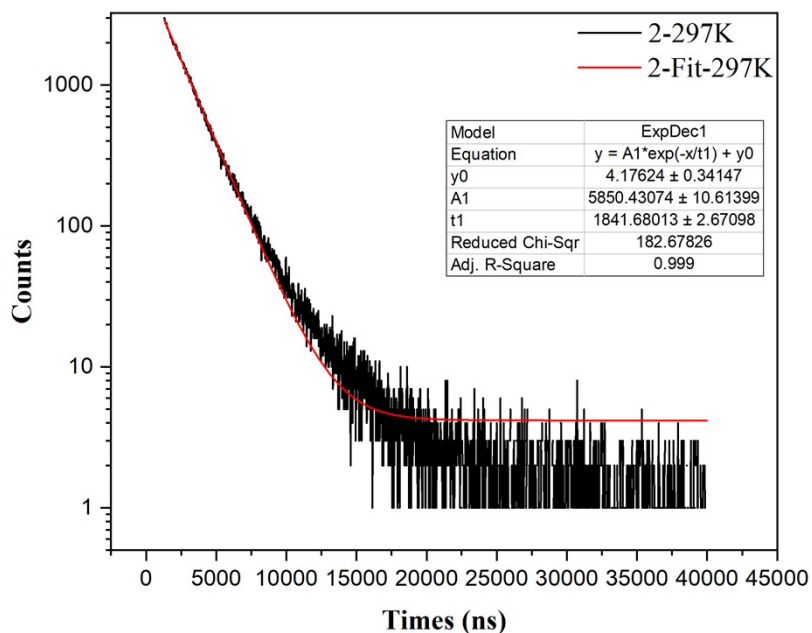

**Figure S34.** Time profiles of luminescence decay and exponential fit spectrum of **2** at 297 K ( $\lambda_{em} = 553$  nm).

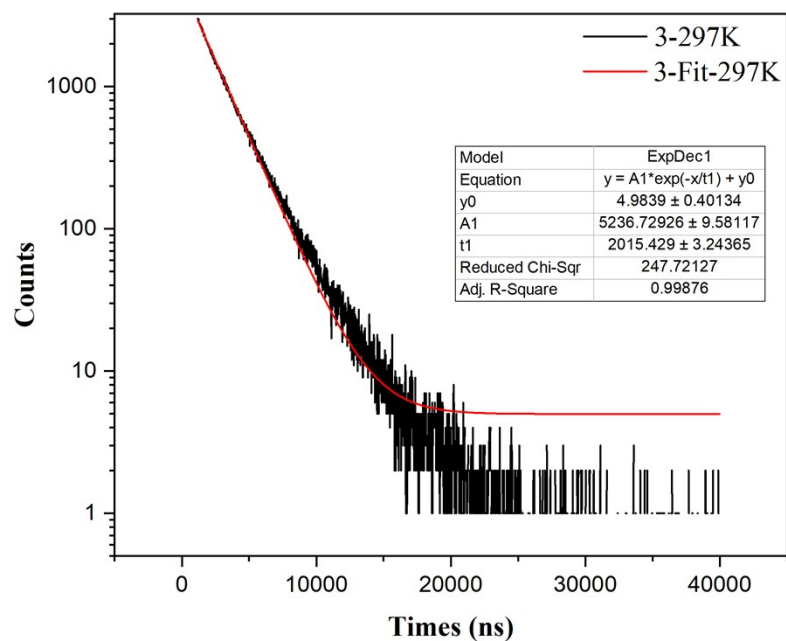

**Figure S35.** Time profiles of luminescence decay and exponential fit spectrum of **3** at 297 K ( $\lambda_{em} = 555$  nm).

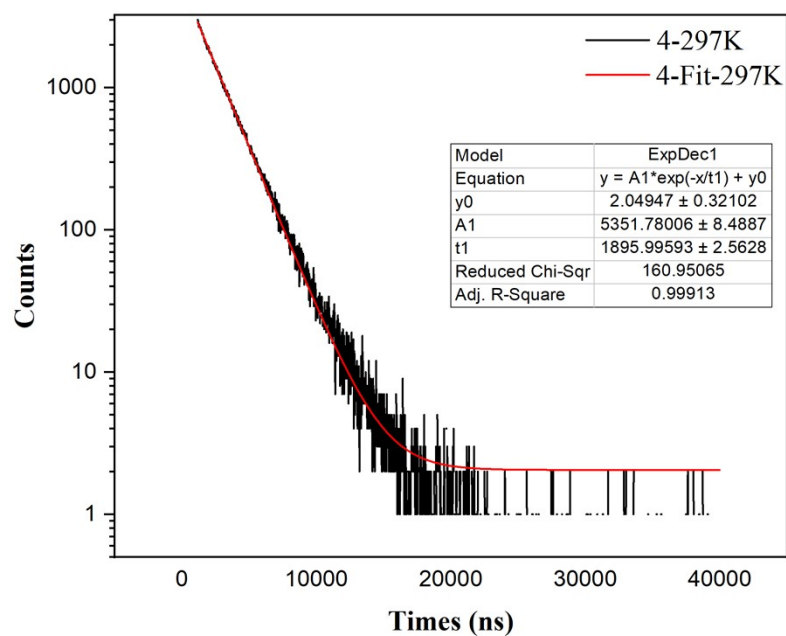

**Figure S36.** Time profiles of luminescence decay and exponential fit spectrum of **4** at 297 K ( $\lambda_{em} = 534$  nm).

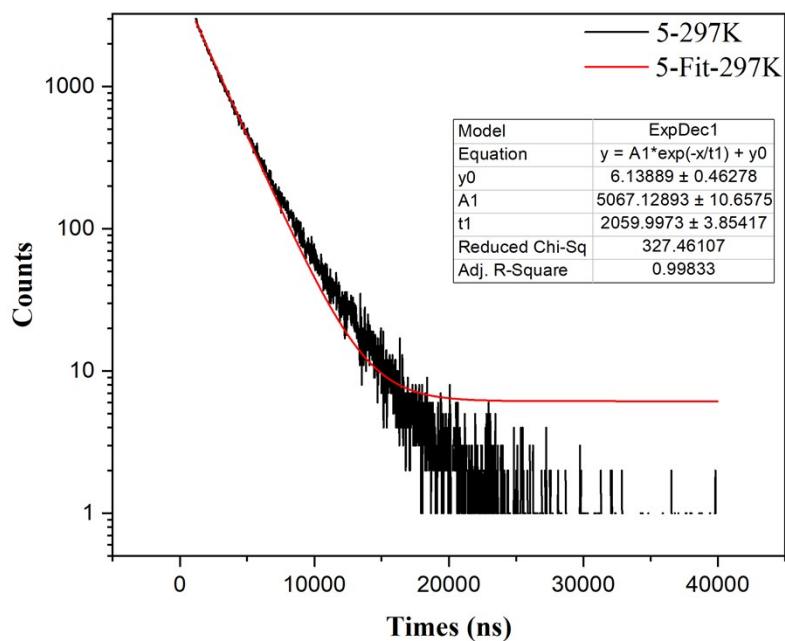

**Figure S37.** Time profiles of luminescence decay and exponential fit spectrum of **5** at 297 K ( $\lambda_{em} = 557$  nm).

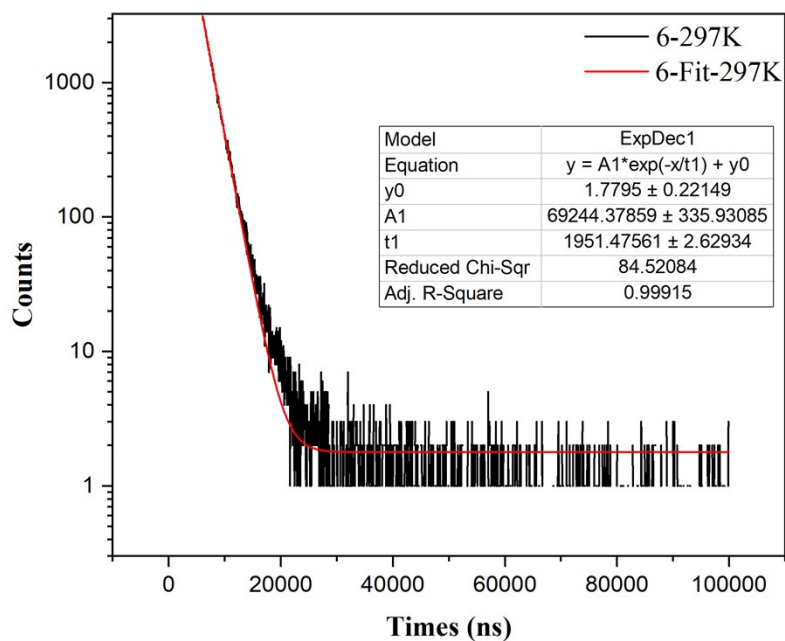

**Figure S38.** Time profiles of luminescence decay and exponential fit spectrum of **6** at 297 K ( $\lambda_{em} = 556$  nm).

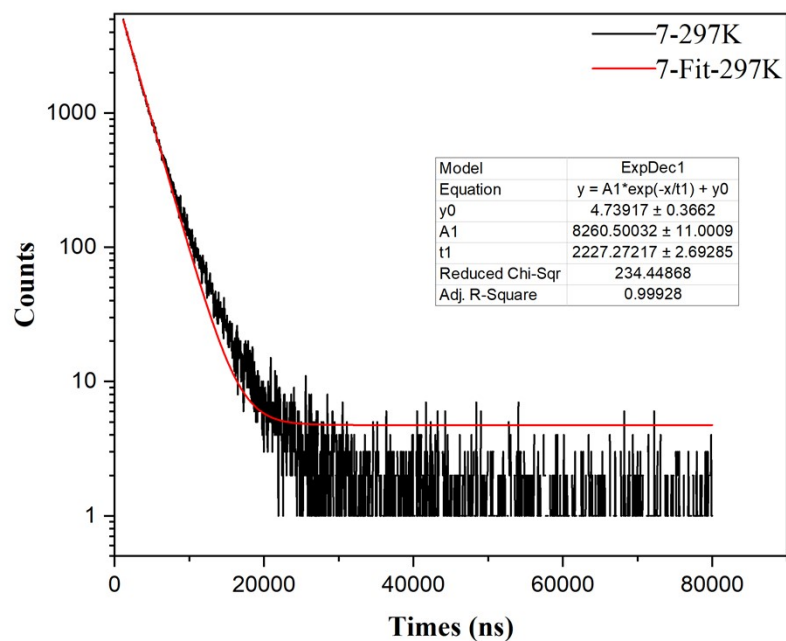

**Figure S39.** Time profiles of luminescence decay and exponential fit spectrum of **7** at 297 K ( $\lambda_{em} = 558$  nm).

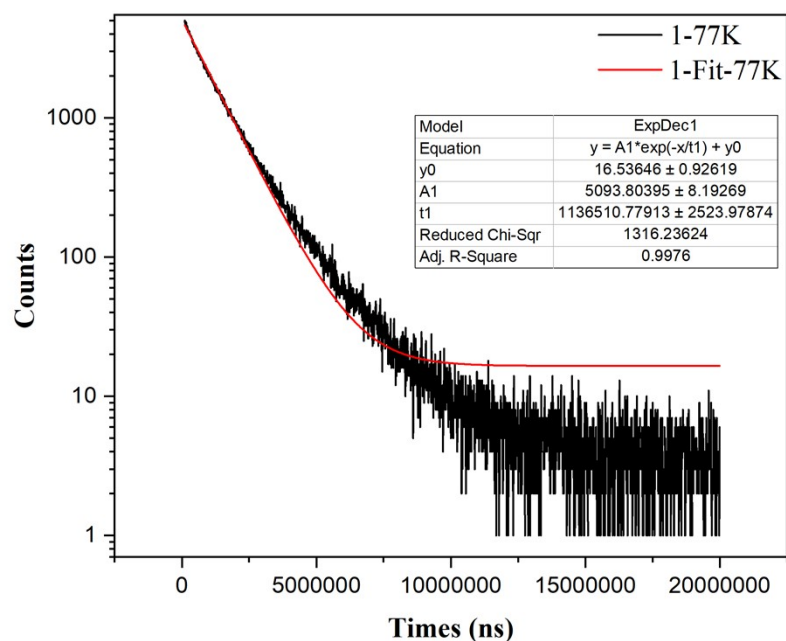

**Figure S40.** Time profiles of luminescence decay and exponential fit spectrum of **1** at 77 K ( $\lambda_{em} = 547$  nm).

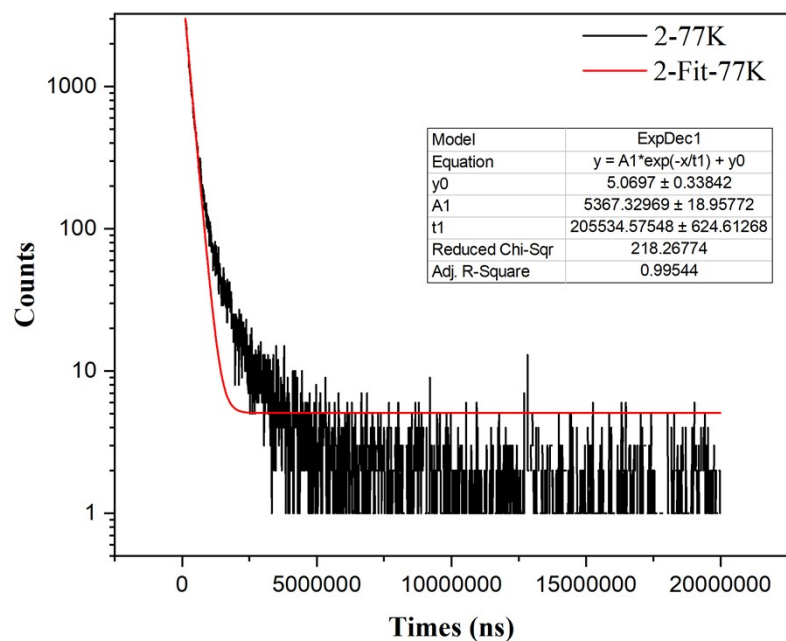

**Figure S41.** Time profiles of luminescence decay and exponential fit spectrum of **2** at 77 K ( $\lambda_{em} = 556$  nm).

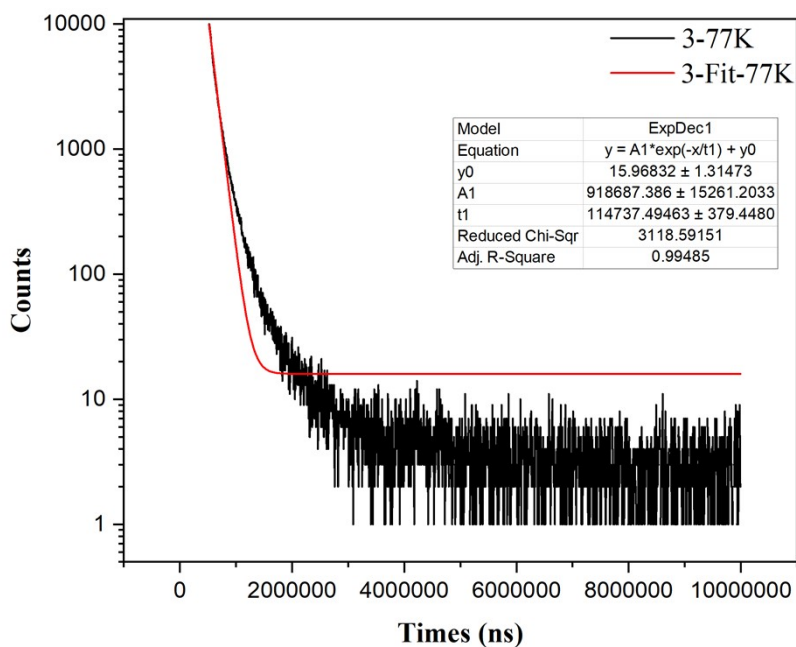

**Figure S42.** Time profiles of luminescence decay and exponential fit spectrum of **3** at 77 K ( $\lambda_{em} = 547$  nm).

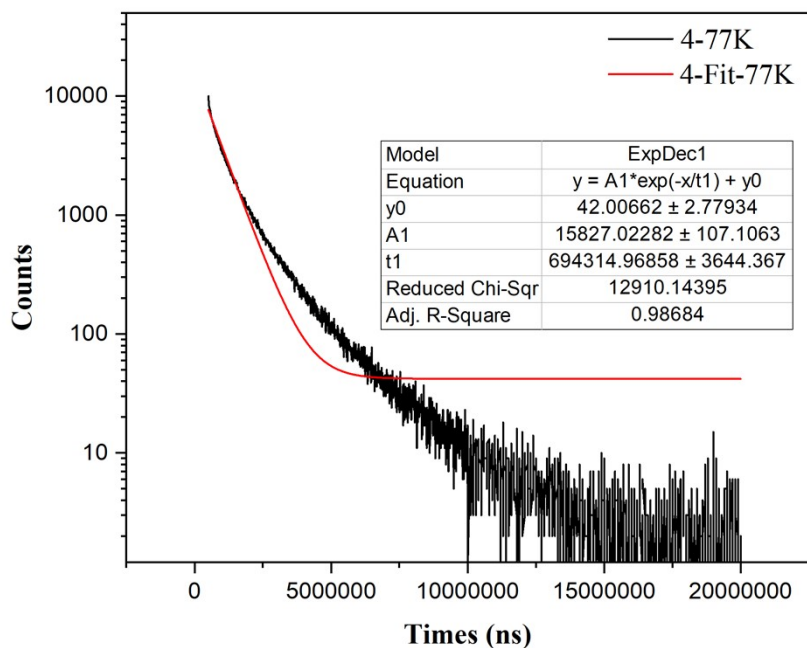

**Figure S43.** Time profiles of luminescence decay and exponential fit spectrum of **4** at 77 K ( $\lambda_{em} = 525$  nm).

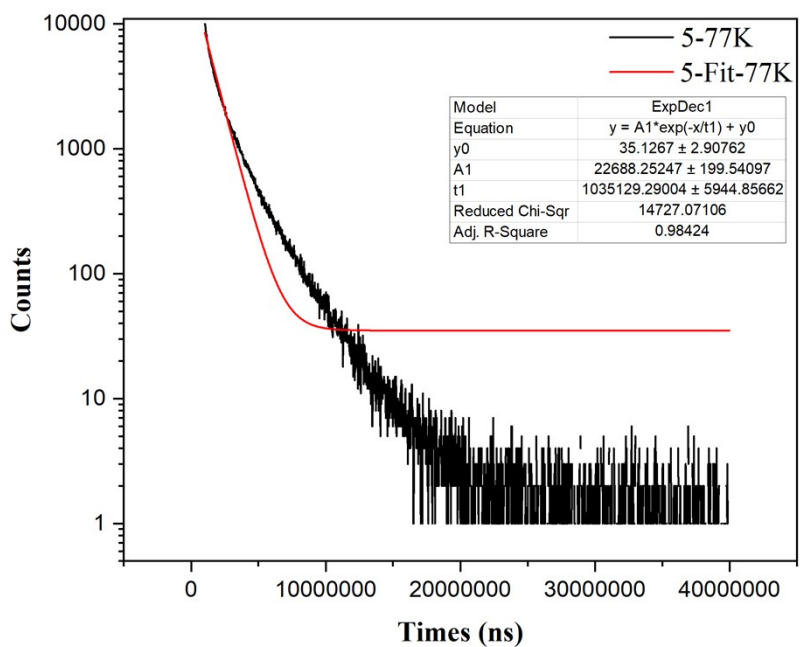

**Figure S44.** Time profiles of luminescence decay and exponential fit spectrum of **5** at 77 K ( $\lambda_{em} = 549$  nm).

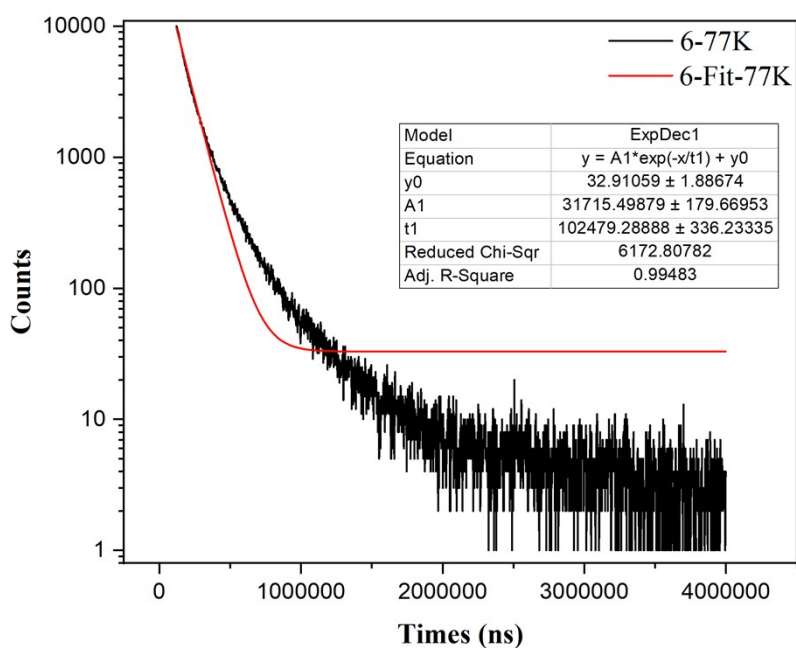

**Figure S45.** Time profiles of luminescence decay and exponential fit spectrum of **6** at 77 K ( $\lambda_{em} = 545$  nm).

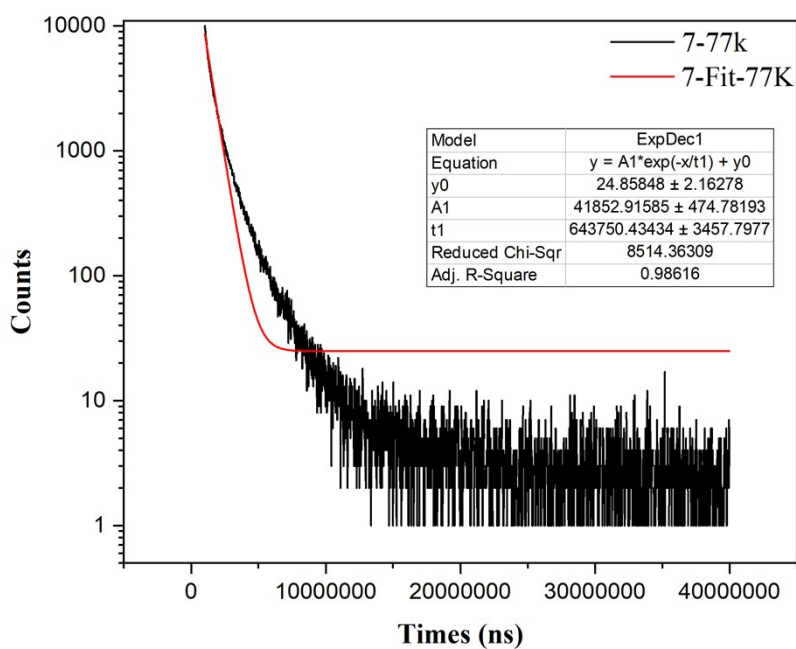

**Figure S46.** Time profiles of luminescence decay and exponential fit spectrum of **7** at 77 K ( $\lambda_{em} = 548$  nm).



## 5. Computational details

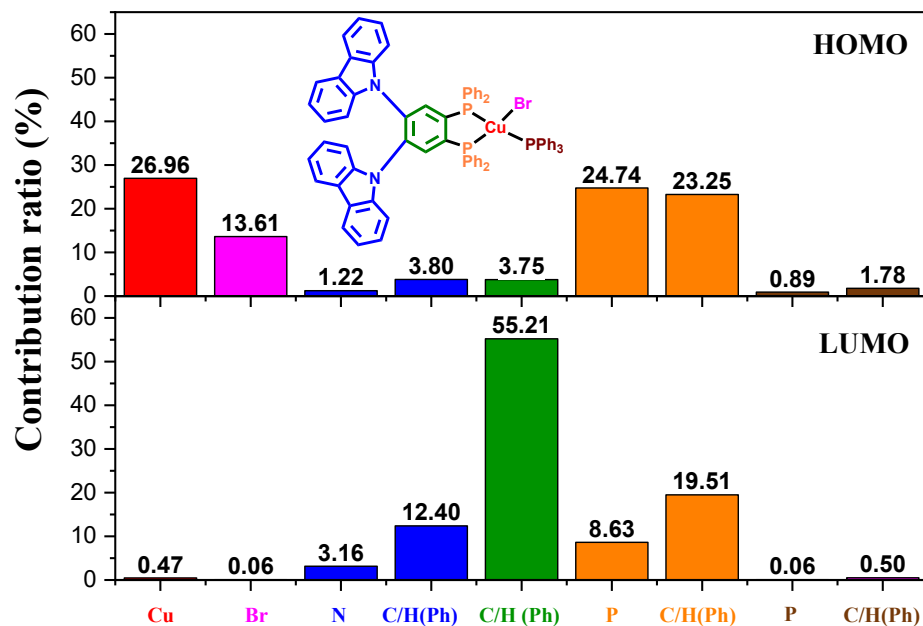

Figure S47. Compositions of the frontier molecular orbitals at optimized  $S_0$  geometry of complex 1.

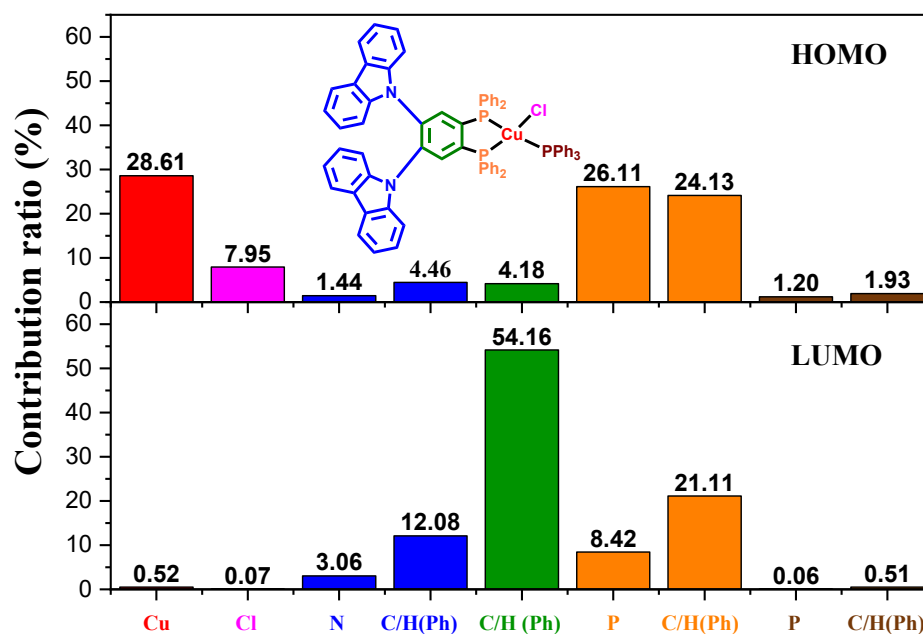

Figure S48. Compositions of the frontier molecular orbitals at optimized  $S_0$  geometry of complex 2.

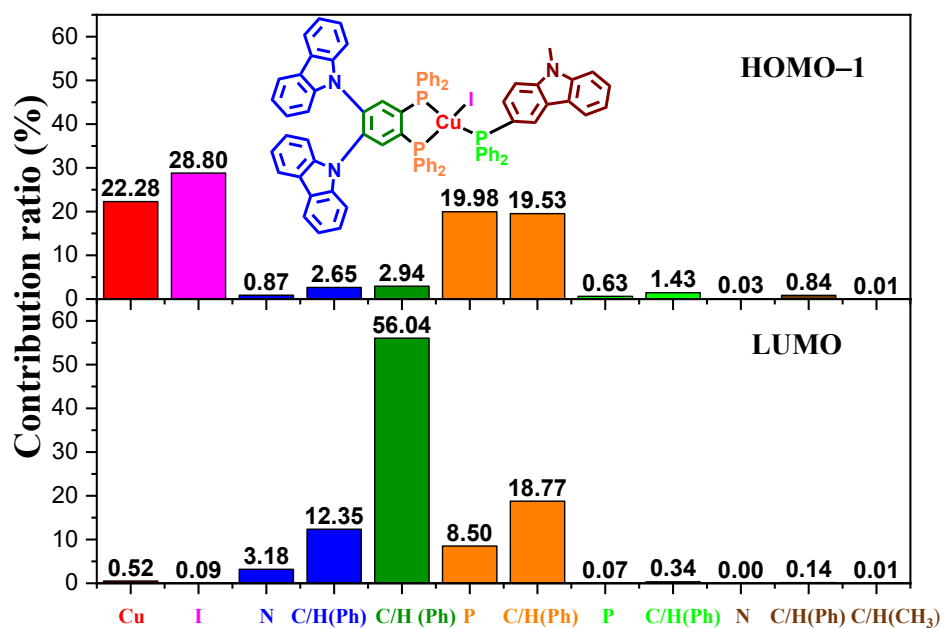

Figure S49. Compositions of the frontier molecular orbitals at optimized  $S_0$  geometry of complex 3.

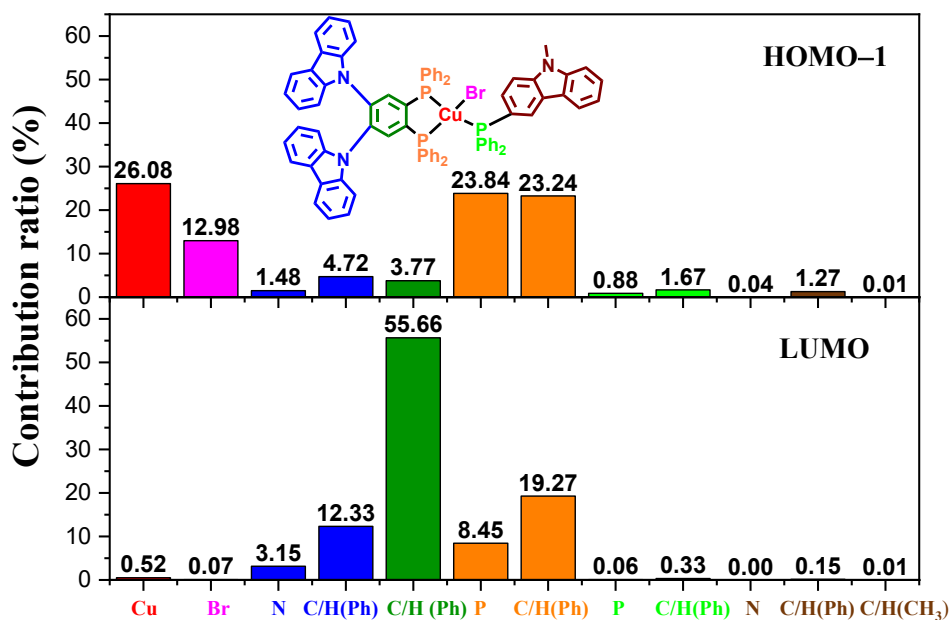

Figure S50. Compositions of the frontier molecular orbitals at optimized  $S_0$  geometry of complex 4.

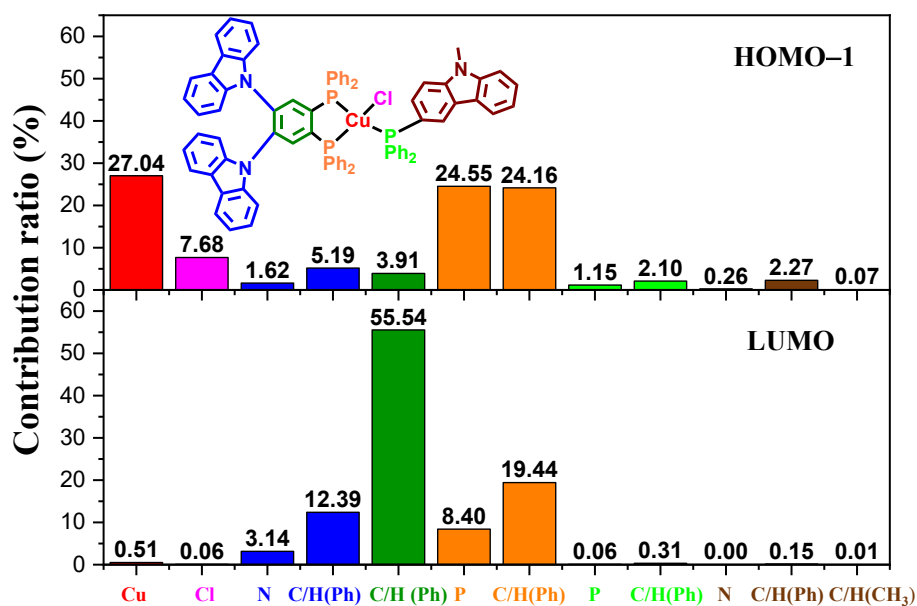

**Figure S51.** Compositions of the frontier molecular orbitals at optimized  $S_0$  geometry of complex **5**.

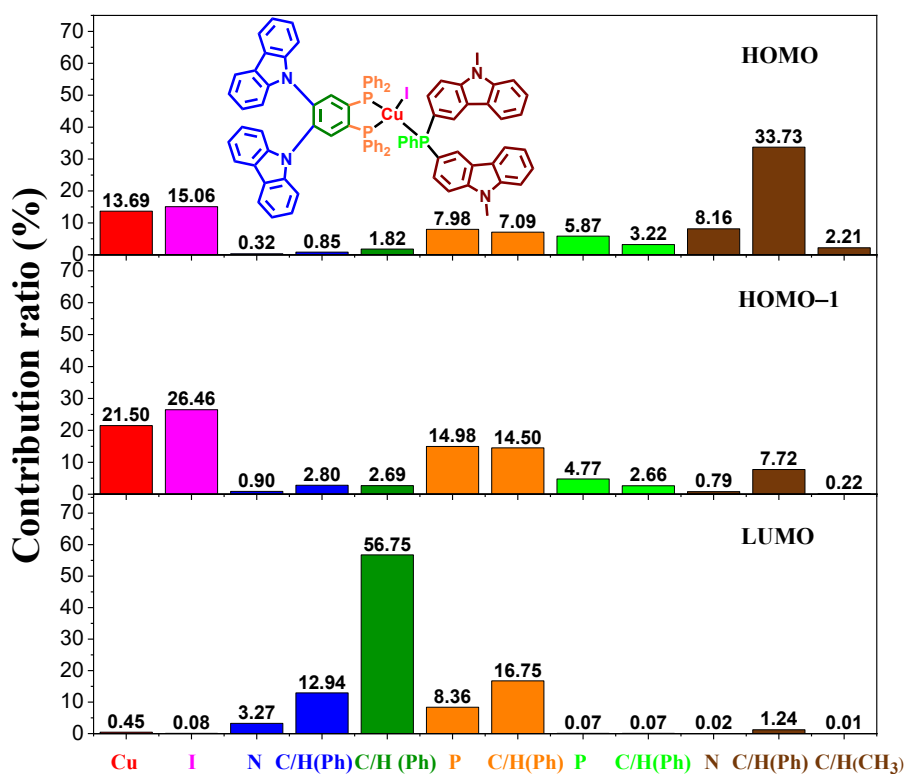

**Figure S52.** Compositions of the frontier molecular orbitals at optimized  $S_0$  geometry of complex **6**.

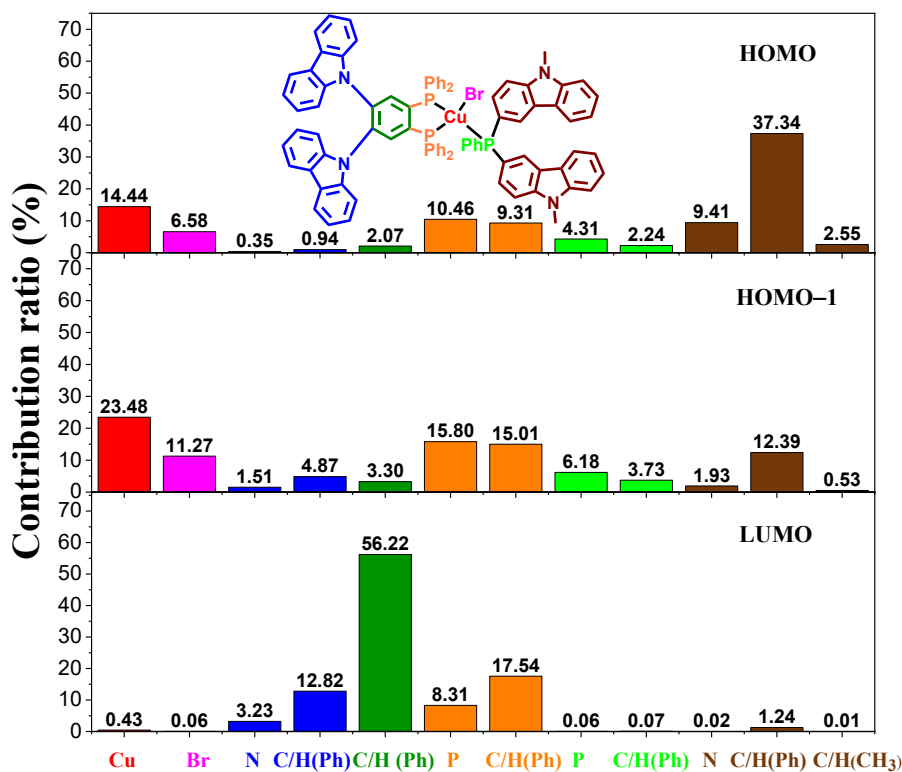

Figure S53. Compositions of the frontier molecular orbitals at optimized  $S_0$  geometry of complex 7.

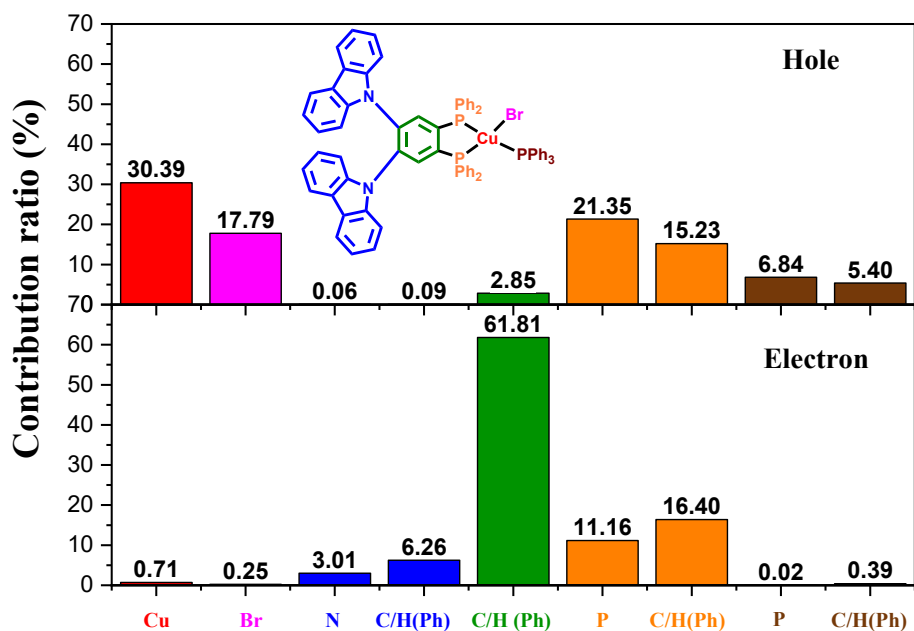

Figure S54. Compositions of the frontier natural transition orbitals at optimized  $S_1$  geometry of complex 1.

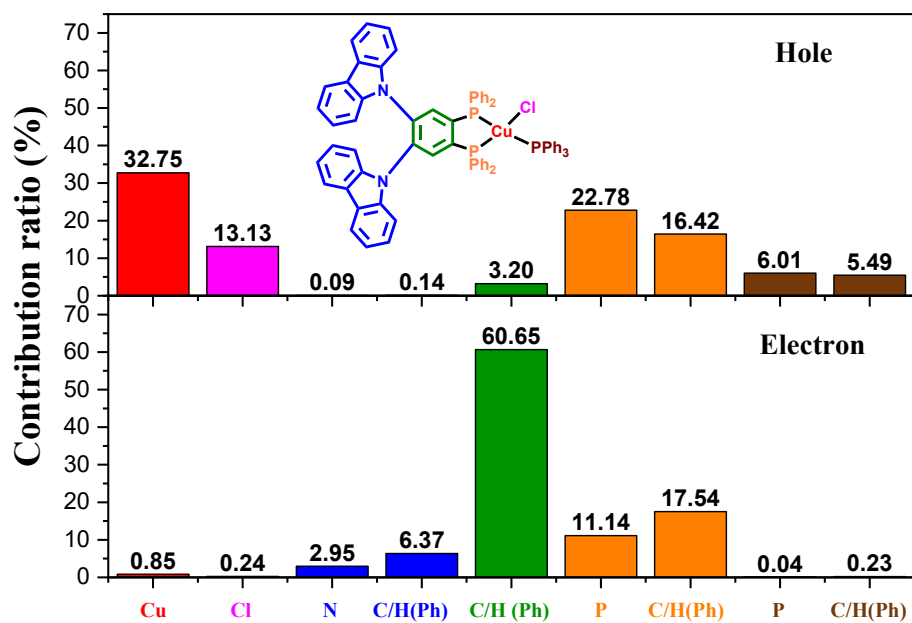

**Figure S55.** Compositions of the frontier natural transition orbitals at optimized  $S_1$  geometry of complex 2.

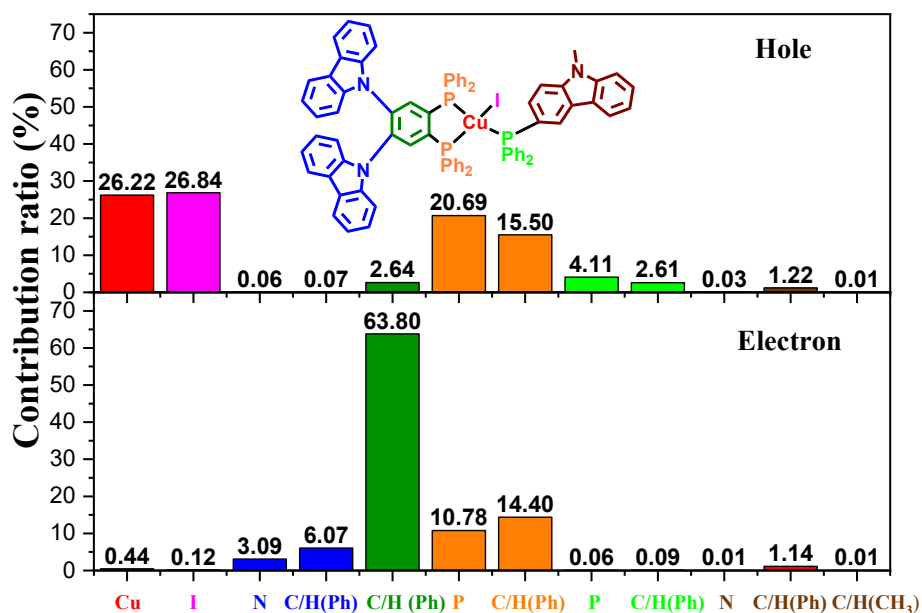

**Figure S56.** Compositions of the frontier natural transition orbitals at optimized  $S_1$  geometry of complex 3.

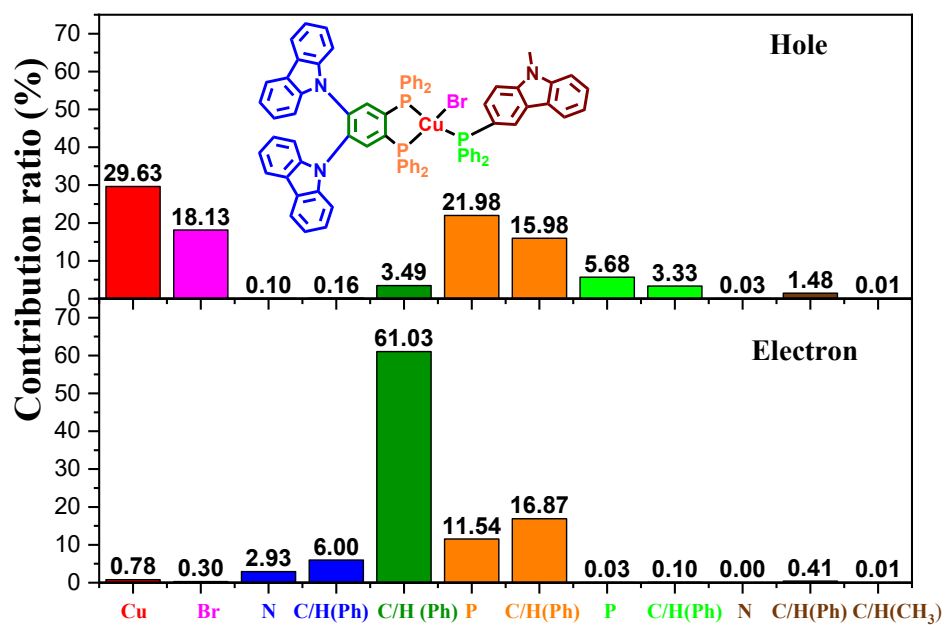

Figure S57. Compositions of the frontier natural transition orbitals at optimized  $S_1$  geometry of complex 4.

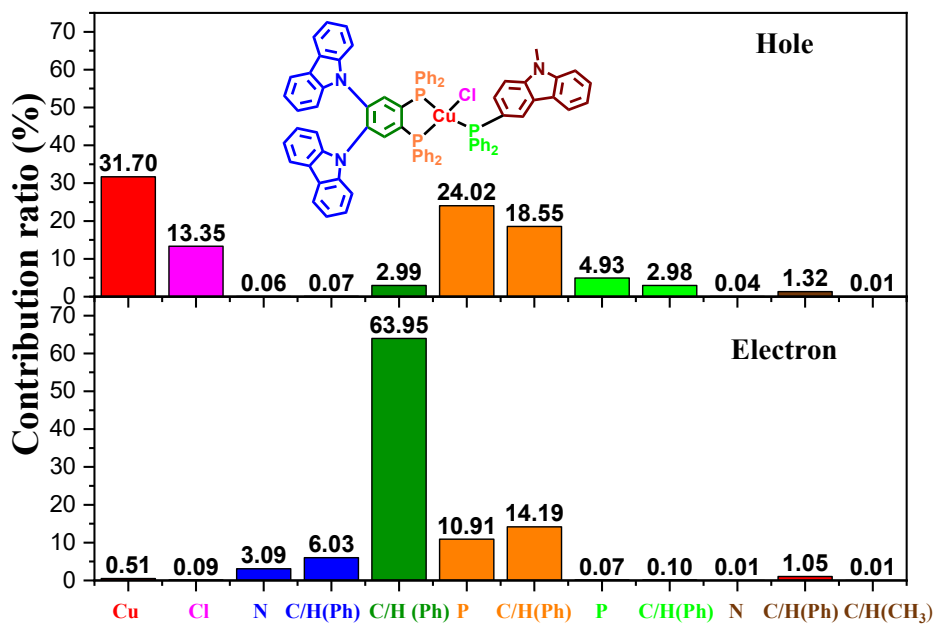

Figure S58. Compositions of the frontier natural transition orbitals at optimized  $S_1$  geometry of complex 5.

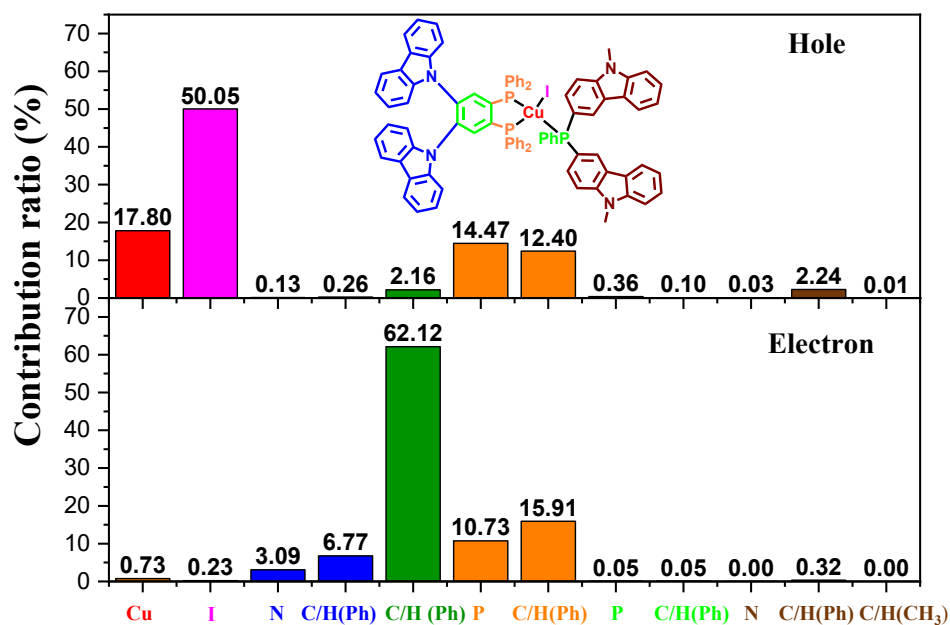

Figure S59. Compositions of the frontier natural transition orbitals at optimized  $S_1$  geometry of complex **6**.

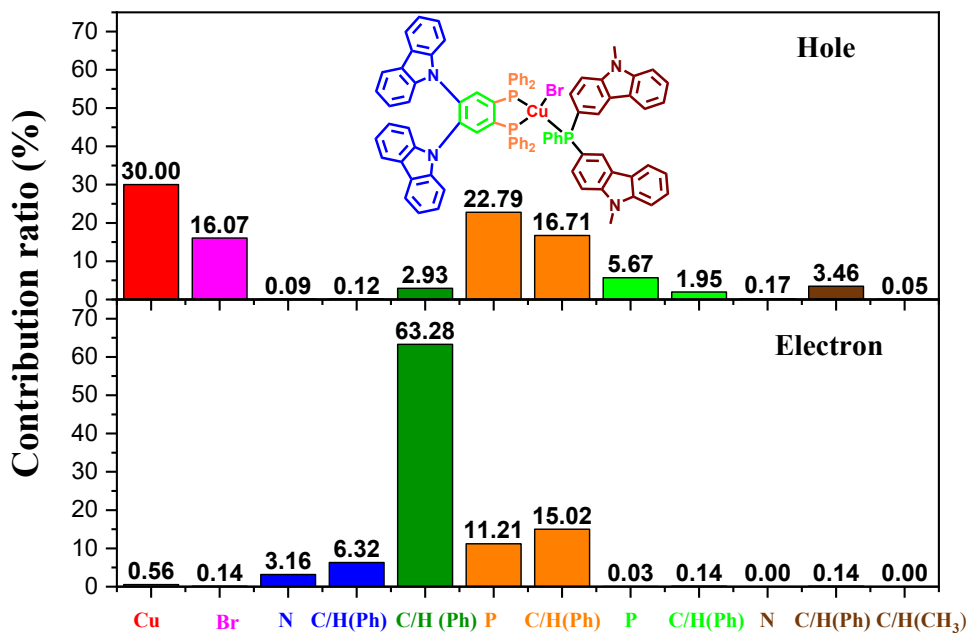

Figure S60. Compositions of the frontier natural transition orbitals at optimized  $S_1$  geometry of complex **7**.

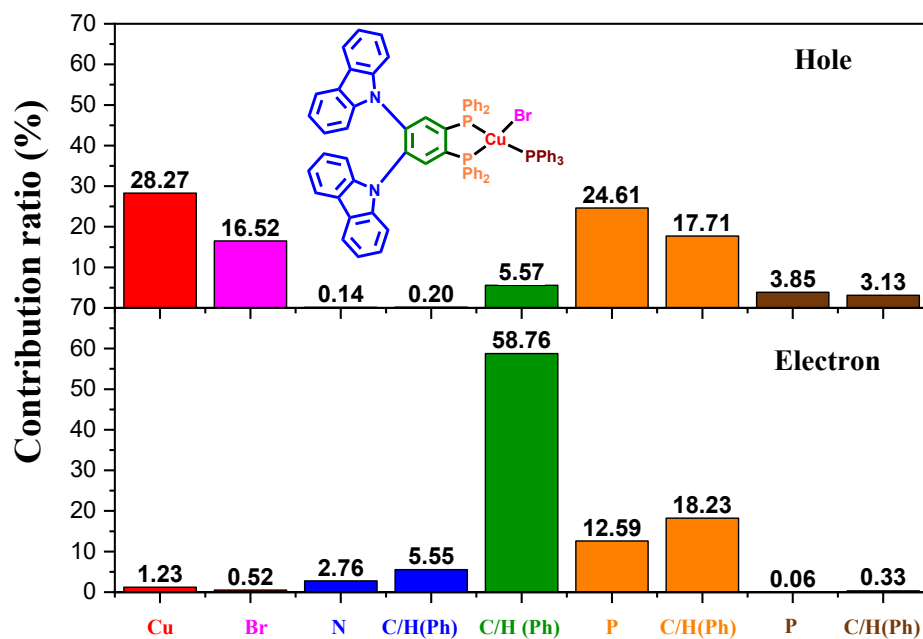

Figure S61. Compositions of the frontier natural transition orbitals at optimized  $T_1$  geometry of complex 1.

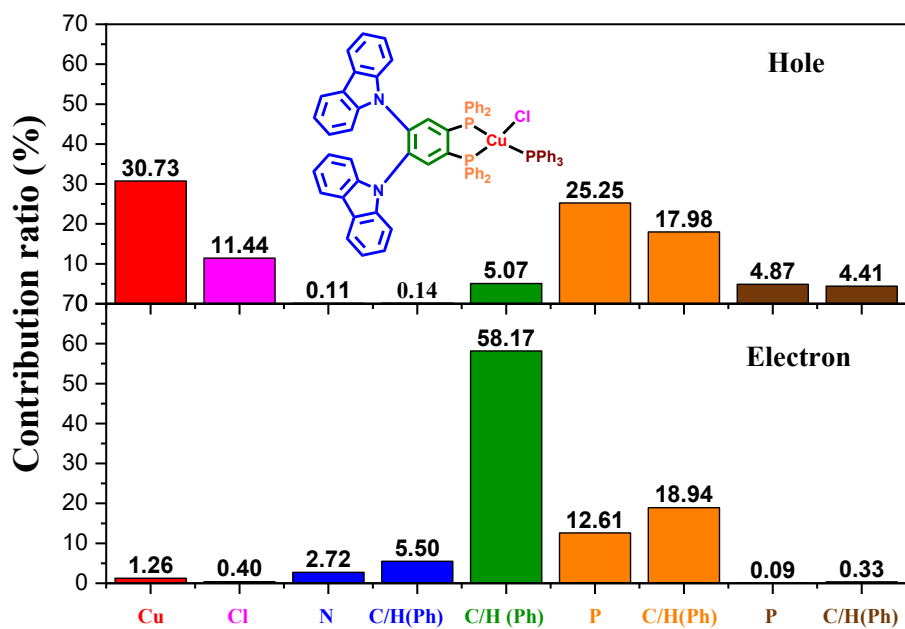

Figure S62. Compositions of the frontier natural transition orbitals at optimized  $T_1$  geometry of complex 2.



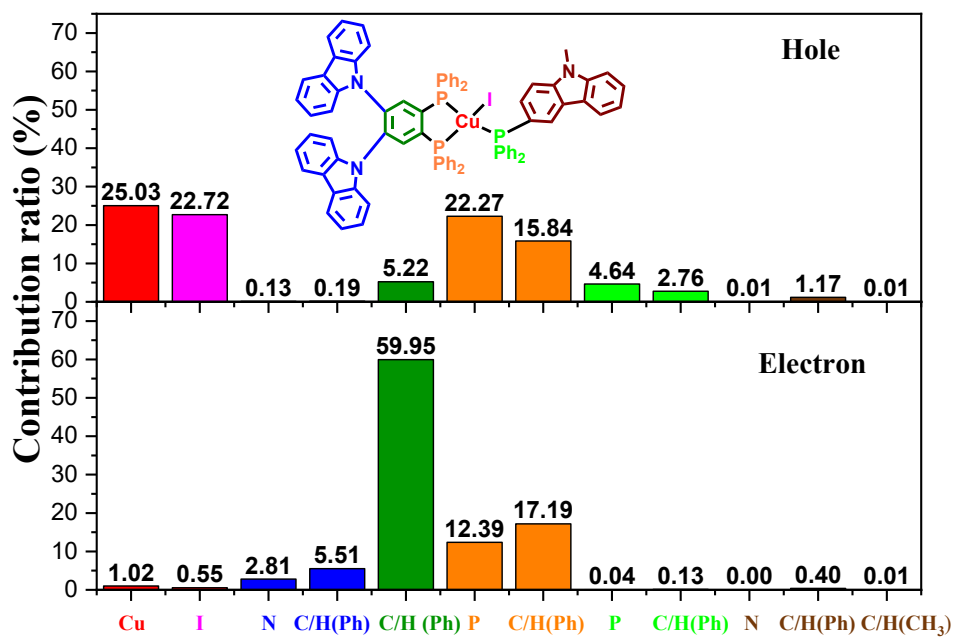

Figure S63. Compositions of the frontier natural transition orbitals at optimized  $T_1$  geometry of complex 3.

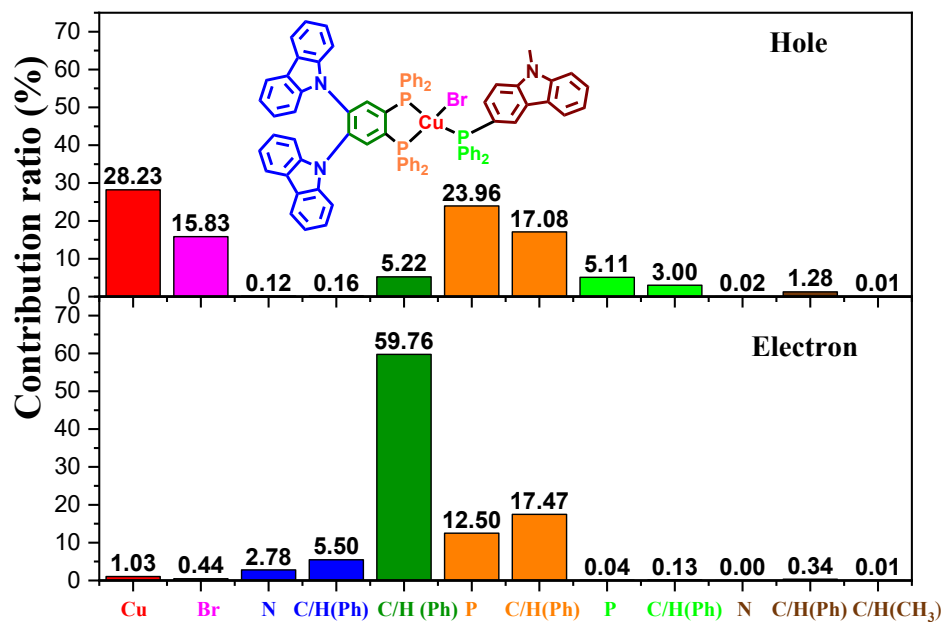

Figure S64. Compositions of the frontier natural transition orbitals at optimized  $T_1$  geometry of complex 4.

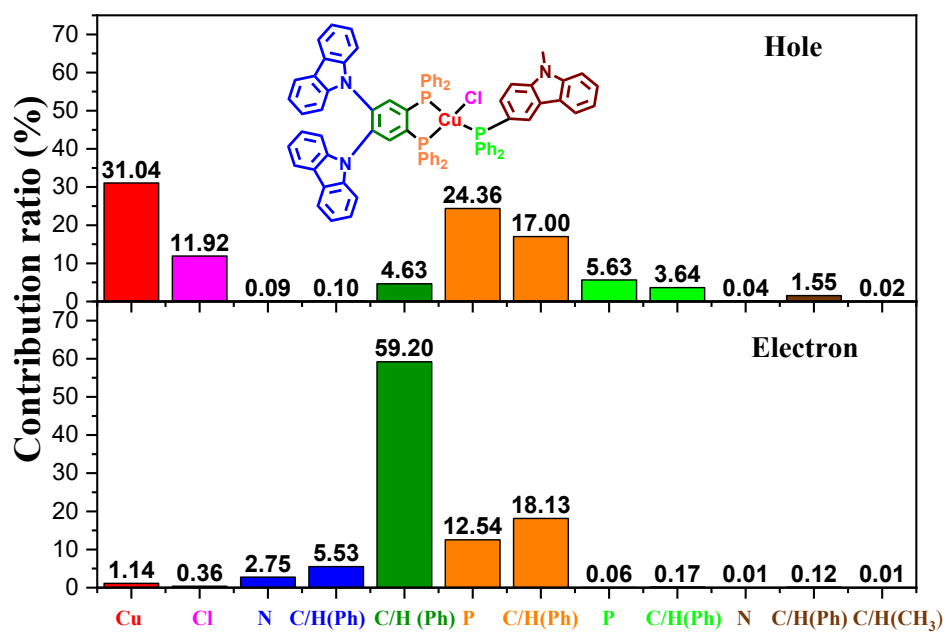

**Figure S65.** Compositions of the frontier natural transition orbitals at optimized  $T_1$  geometry of complex **5**.

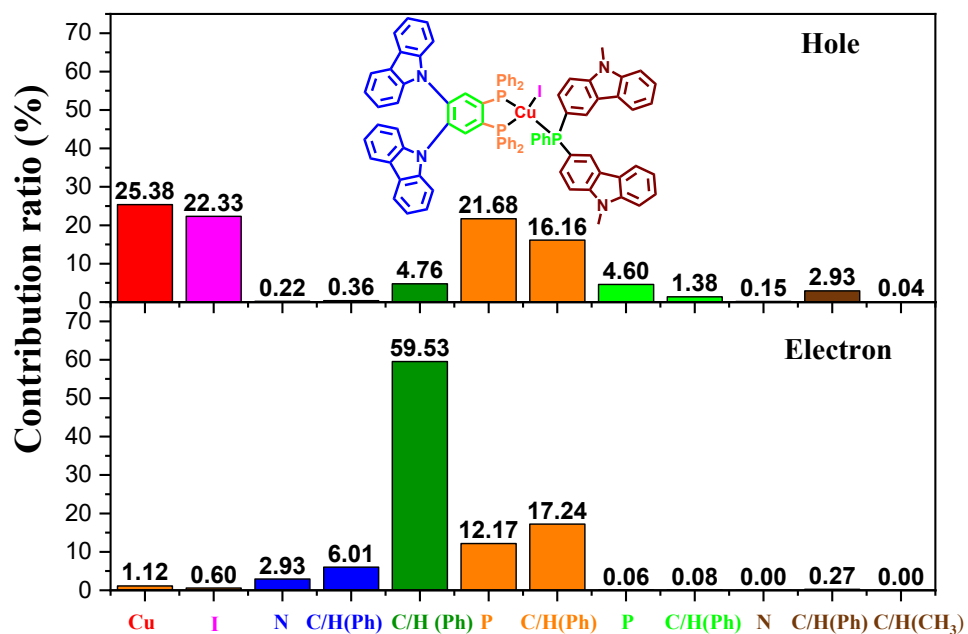

**Figure S66.** Compositions of the frontier natural transition orbitals at optimized  $T_1$  geometry of complex **6**.

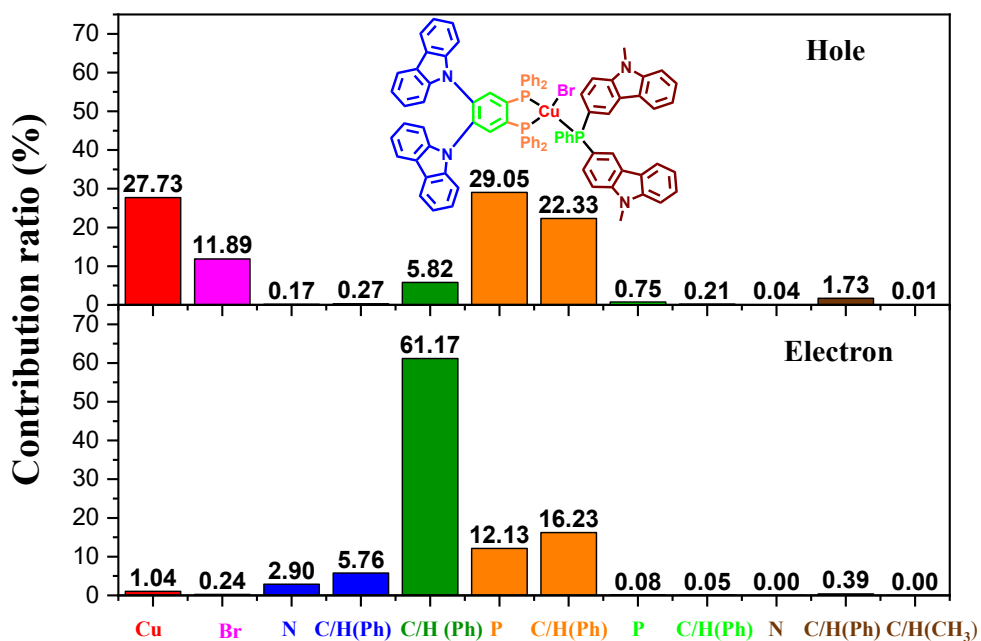

**Figure S67.** Compositions of the frontier natural transition orbitals at optimized  $T_1$  geometry of complex 7.

| Complex | Geometry |       |       |
|---------|----------|-------|-------|
|         | $S_0$    | $S_1$ | $T_1$ |
| 1       |          |       |       |
|         |          |       |       |

2

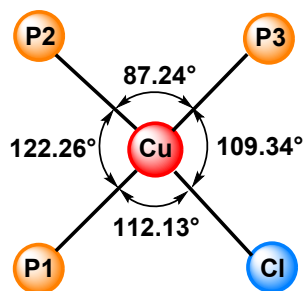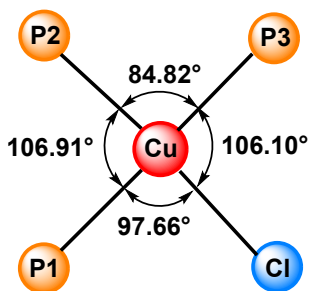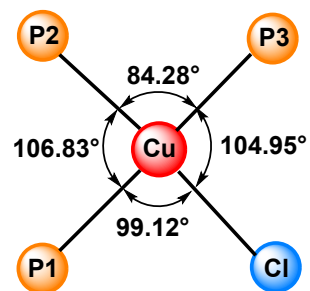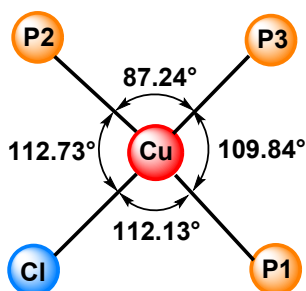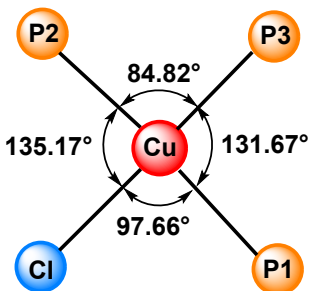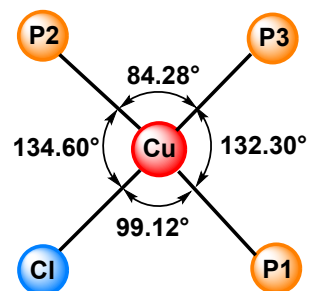

3

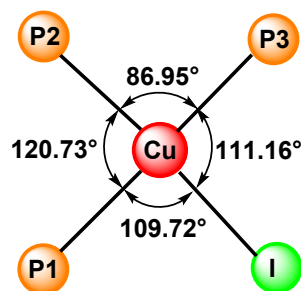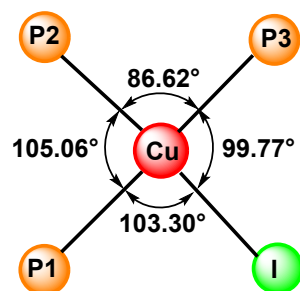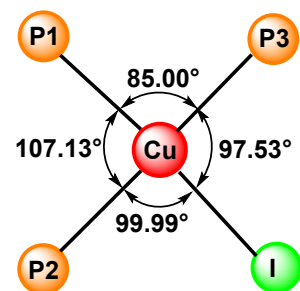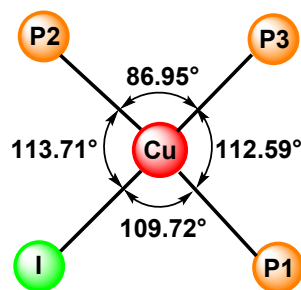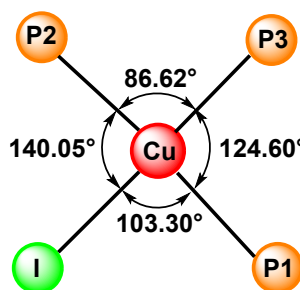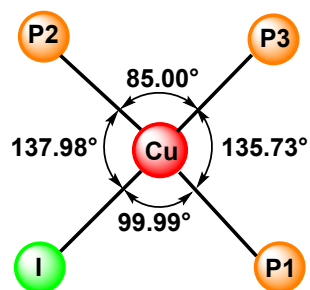

4

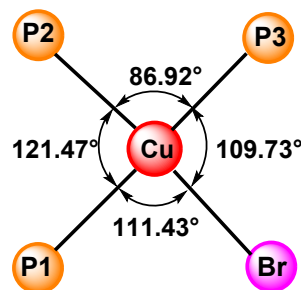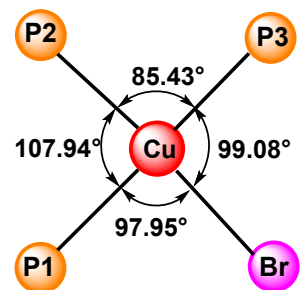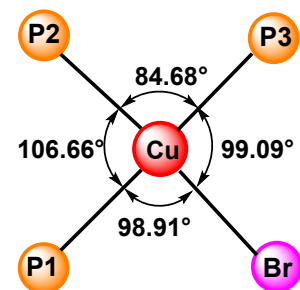

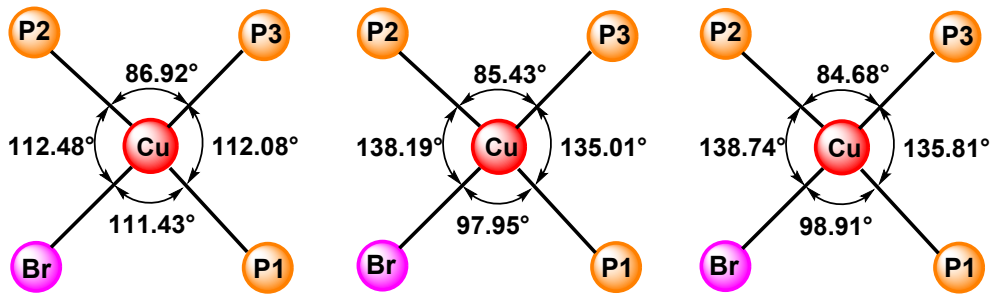

5

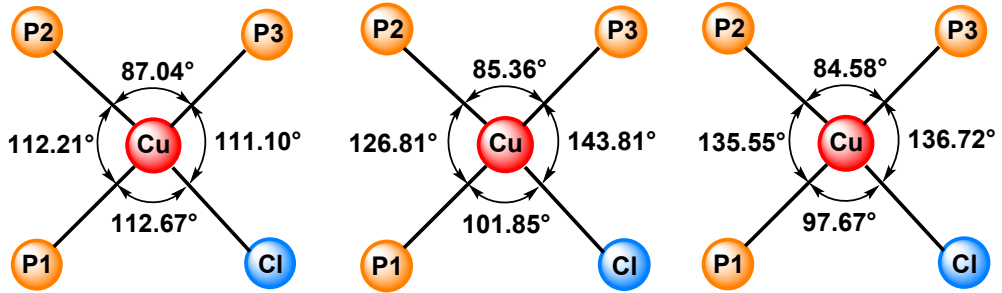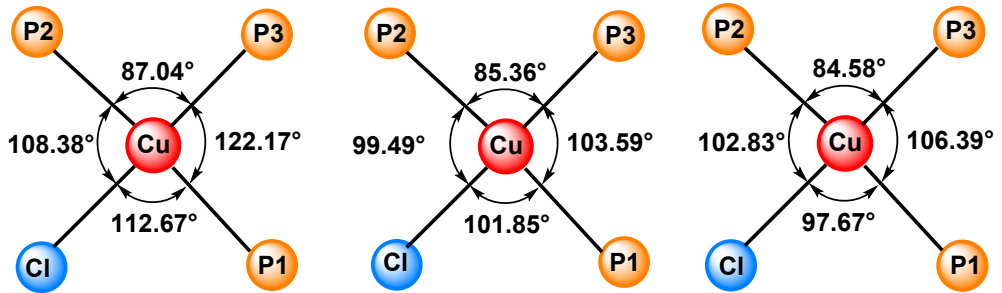

6

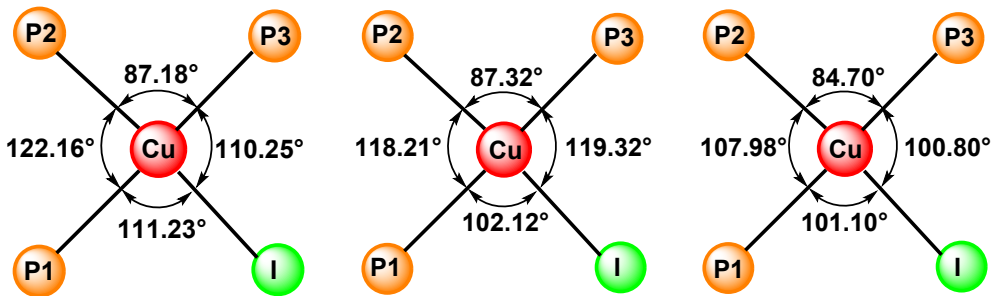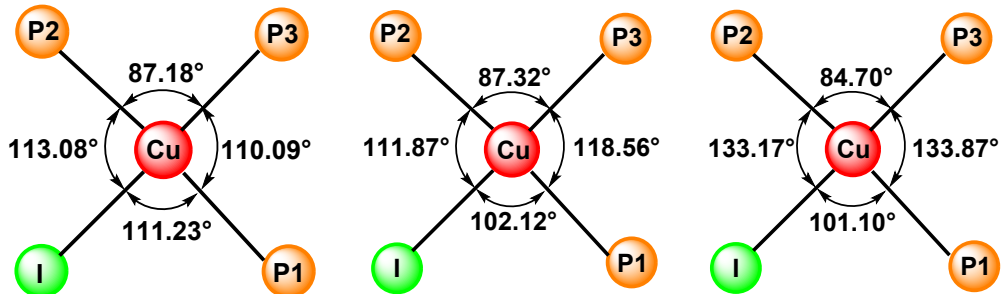

7

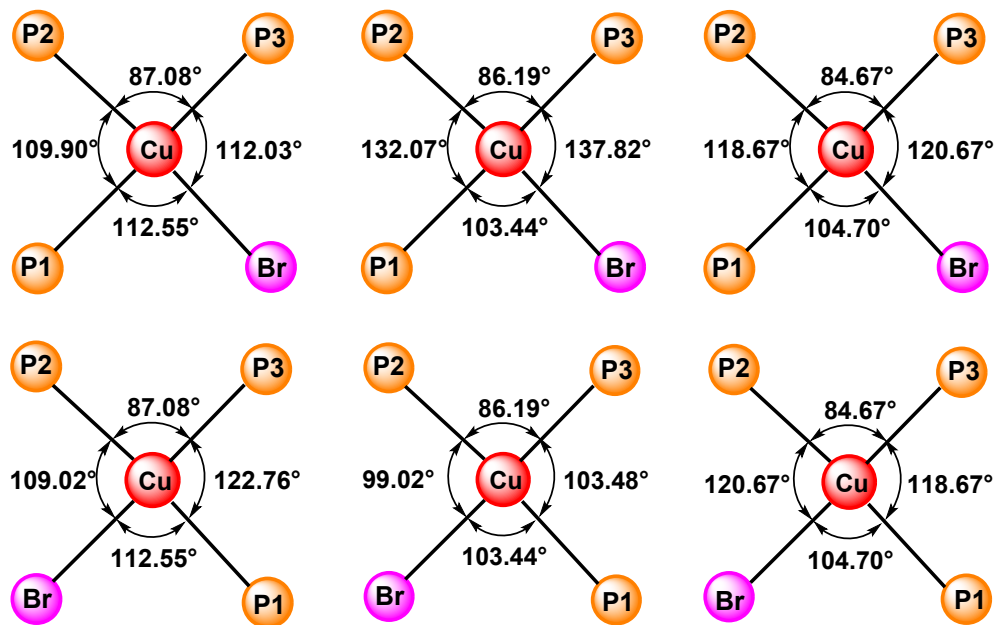

**Figure S68.** The core structures in the optimized S<sub>0</sub>, S<sub>1</sub>, and T<sub>1</sub> geometries for complexes 1–7.

**Table S1.** Crystallographic data and details for complexes **1–7**.

|                                             | <b>1 • CH<sub>2</sub>Cl<sub>2</sub></b>                                                             | <b>2 • 3(CH<sub>2</sub>Cl<sub>2</sub>)</b>                                                              |
|---------------------------------------------|-----------------------------------------------------------------------------------------------------|---------------------------------------------------------------------------------------------------------|
| Empirical formula                           | C <sub>72</sub> H <sub>53</sub> CuBrN <sub>2</sub> P <sub>3</sub> • CH <sub>2</sub> Cl <sub>2</sub> | C <sub>72</sub> H <sub>53</sub> CuClN <sub>2</sub> P <sub>3</sub> • 3(CH <sub>2</sub> Cl <sub>2</sub> ) |
| Formula weight                              | 1267.45                                                                                             | 1392.84                                                                                                 |
| Temperature (K)                             | 100.00(10)                                                                                          | 199.99(10)                                                                                              |
| Wavelength (Å)                              | 1.54184                                                                                             | 1.54184                                                                                                 |
| Crystal system                              | Monoclinic                                                                                          | Triclinic                                                                                               |
| Space group                                 | P2 <sub>1</sub> /c                                                                                  | P-1                                                                                                     |
| <i>a</i> (Å)                                | 10.31050(10)                                                                                        | 10.05020(10)                                                                                            |
| <i>b</i> (Å)                                | 16.27350(10)                                                                                        | 14.4627(2)                                                                                              |
| <i>c</i> (Å)                                | 37.9409(2)                                                                                          | 24.4386(3)                                                                                              |
| $\alpha$ (°)                                | 90                                                                                                  | 106.0020(10)                                                                                            |
| $\beta$ (°)                                 | 94.0320(10)                                                                                         | 95.2810(10)                                                                                             |
| $\gamma$ (°)                                | 90                                                                                                  | 97.9430(10)                                                                                             |
| <i>V</i> (Å <sup>3</sup> )                  | 6350.27(8)                                                                                          | 3350.08(7)                                                                                              |
| <i>Z</i>                                    | 4                                                                                                   | 2                                                                                                       |
| $\rho$ (g cm <sup>-3</sup> )                | 1.326                                                                                               | 1.381                                                                                                   |
| $\mu$ (mm <sup>-1</sup> )                   | 3.045                                                                                               | 4.055                                                                                                   |
| <i>F</i> (0 0 0)                            | 2600                                                                                                | 1432                                                                                                    |
| $\theta$ range for data collection (°)      | 2.956 to 76.704                                                                                     | 3.226 to 76.603                                                                                         |
| Index ranges                                | -12 ≤ <i>h</i> ≤ 13<br>-18 ≤ <i>k</i> ≤ 20<br>-47 ≤ <i>l</i> ≤ 47                                   | -12 ≤ <i>h</i> ≤ 12<br>-18 ≤ <i>k</i> ≤ 16<br>-30 ≤ <i>l</i> ≤ 30                                       |
| Independent reflections                     | 12814 [R(int) = 0.0434]                                                                             | 13539 [R(int) = 0.1070]                                                                                 |
| Completeness to $\theta = 67.684^\circ$     | 99.5%                                                                                               | 99.8%                                                                                                   |
| Max. and min. transmission                  | 1.00000 and 0.48555                                                                                 | 1.00000 and 0.56699                                                                                     |
| Gof                                         | 1.046                                                                                               | 1.101                                                                                                   |
| Final <i>R</i> indices [I > 2σ( <i>I</i> )] | <i>R</i> <sub>1</sub> = 0.0359<br>w <i>R</i> <sub>2</sub> = 0.0922                                  | <i>R</i> <sub>1</sub> = 0.0818<br>w <i>R</i> <sub>2</sub> = 0.2272                                      |
| <i>R</i> (all data)                         | <i>R</i> <sub>1</sub> = 0.0387<br>w <i>R</i> <sub>2</sub> = 0.0941                                  | <i>R</i> <sub>1</sub> = 0.0880<br>w <i>R</i> <sub>2</sub> = 0.2362                                      |
| Max/min (e Å <sup>3</sup> )                 | 0.653 and -1.072                                                                                    | 1.338 and -1.301                                                                                        |

|                                             | 3                                                                  | 4                                                                  | 5                                                                  |
|---------------------------------------------|--------------------------------------------------------------------|--------------------------------------------------------------------|--------------------------------------------------------------------|
| Empirical formula                           | C <sub>79</sub> H <sub>58</sub> CuIN <sub>3</sub> P <sub>3</sub>   | C <sub>79</sub> H <sub>58</sub> CuBrN <sub>3</sub> P <sub>3</sub>  | C <sub>79</sub> H <sub>58</sub> CuClN <sub>3</sub> P <sub>3</sub>  |
| Formula weight                              | 1332.63                                                            | 1285.64                                                            | 1241.18                                                            |
| Temperature (K)                             | 100.00(10)                                                         | 100.00(10)                                                         | 100.00(10)                                                         |
| Wavelength (Å)                              | 1.54184                                                            | 1.54184                                                            | 1.54184                                                            |
| Crystal system                              | Monoclinic                                                         | Monoclinic                                                         | Monoclinic                                                         |
| Space group                                 | P2 <sub>1</sub> /n                                                 | P2 <sub>1</sub> /n                                                 | P2 <sub>1</sub> /n                                                 |
| <i>a</i> (Å)                                | 13.79570(10)                                                       | 13.7946(2)                                                         | 13.87700(10)                                                       |
| <i>b</i> (Å)                                | 13.57050(10)                                                       | 13.5185(2)                                                         | 13.53800(10)                                                       |
| <i>c</i> (Å)                                | 38.2006(4)                                                         | 37.9095(6)                                                         | 37.2607(3)                                                         |
| <i>α</i> (°)                                | 90                                                                 | 90                                                                 | 90                                                                 |
| <i>β</i> (°)                                | 96.3610(10)                                                        | 96.7570(10)                                                        | 97.2860(10)                                                        |
| <i>γ</i> (°)                                | 90                                                                 | 90                                                                 | 90                                                                 |
| <i>V</i> (Å <sup>3</sup> )                  | 7107.68(11)                                                        | 7020.35(18)                                                        | 6943.53(9)                                                         |
| <i>Z</i>                                    | 4                                                                  | 4                                                                  | 4                                                                  |
| <i>ρ</i> (g cm <sup>-3</sup> )              | 1.245                                                              | 1.216                                                              | 1.187                                                              |
| <i>μ</i> (mm <sup>-1</sup> )                | 4.810                                                              | 2.084                                                              | 1.786                                                              |
| <i>F</i> (0 0 0)                            | 2720                                                               | 2648                                                               | 2576                                                               |
| <i>θ</i> range for data collection (°)      | 2.328 to 76.826                                                    | 3.301 to 76.830                                                    | 2.391 to 76.791                                                    |
| Index ranges                                | -15 ≤ <i>h</i> ≤ 17<br>-15 ≤ <i>k</i> ≤ 17<br>-43 ≤ <i>l</i> ≤ 48  | -17 ≤ <i>h</i> ≤ 17<br>-17 ≤ <i>k</i> ≤ 15<br>-47 ≤ <i>l</i> ≤ 43  | -17 ≤ <i>h</i> ≤ 17<br>-14 ≤ <i>k</i> ≤ 17<br>-44 ≤ <i>l</i> ≤ 46  |
| Independent reflections                     | 14432 [R(int) = 0.0470]                                            | 14089 [R(int) = 0.0671]                                            | 14156 [R(int) = 0.0403]                                            |
| Completeness to <i>θ</i> = 67.684°          | 99.9%                                                              | 99.4%                                                              | 99.8%                                                              |
| Max. and min. transmission                  | 1.00000 and 0.73425                                                | 1.00000 and 0.51283                                                | 1.00000 and 0.90148                                                |
| Gof                                         | 1.036                                                              | 1.038                                                              | 1.021                                                              |
| Final <i>R</i> indices [I > 2σ( <i>I</i> )] | <i>R</i> <sub>1</sub> = 0.0424<br>w <i>R</i> <sub>2</sub> = 0.1093 | <i>R</i> <sub>1</sub> = 0.1005<br>w <i>R</i> <sub>2</sub> = 0.2436 | <i>R</i> <sub>1</sub> = 0.0388<br>w <i>R</i> <sub>2</sub> = 0.1033 |
| <i>R</i> (all data)                         | <i>R</i> <sub>1</sub> = 0.0455<br>w <i>R</i> <sub>2</sub> = 0.1115 | <i>R</i> <sub>1</sub> = 0.1095<br>w <i>R</i> <sub>2</sub> = 0.2484 | <i>R</i> <sub>1</sub> = 0.0420<br>w <i>R</i> <sub>2</sub> = 0.1057 |
| Max/min (e Å <sup>3</sup> )                 | 1.280 and -0.810                                                   | 1.314 and -0.966                                                   | 0.420 and -0.374                                                   |



|                                             | <b>6 • CH<sub>2</sub>Cl<sub>2</sub></b>                                                            | <b>7</b>                                                           |
|---------------------------------------------|----------------------------------------------------------------------------------------------------|--------------------------------------------------------------------|
| Empirical formula                           | C <sub>86</sub> H <sub>63</sub> CuIN <sub>4</sub> P <sub>3</sub> • CH <sub>2</sub> Cl <sub>2</sub> | C <sub>86</sub> H <sub>63</sub> CuBrN <sub>4</sub> P <sub>3</sub>  |
| Formula weight                              | 1520.68                                                                                            | 1388.76                                                            |
| Temperature (K)                             | 100.00(10)                                                                                         | 293                                                                |
| Wavelength (Å)                              | 1.54184                                                                                            | 1.54184                                                            |
| Crystal system                              | Triclinic                                                                                          | Triclinic                                                          |
| Space group                                 | P-1                                                                                                | P-1                                                                |
| <i>a</i> (Å)                                | 10.38730(10)                                                                                       | 10.35530(10)                                                       |
| <i>b</i> (Å)                                | 15.8741(2)                                                                                         | 16.0837(3)                                                         |
| <i>c</i> (Å)                                | 24.5313(3)                                                                                         | 24.9522(2)                                                         |
| <i>α</i> (°)                                | 98.9400(10)                                                                                        | 97.8150(10)                                                        |
| <i>β</i> (°)                                | 100.9360(10)                                                                                       | 100.9750(10)                                                       |
| <i>γ</i> (°)                                | 97.5010(10)                                                                                        | 97.9910(10)                                                        |
| <i>V</i> (Å <sup>3</sup> )                  | 3869.47(8)                                                                                         | 3983.40(9)                                                         |
| <i>Z</i>                                    | 2                                                                                                  | 2                                                                  |
| <i>ρ</i> (g cm <sup>-3</sup> )              | 1.305                                                                                              | 1.158                                                              |
| <i>μ</i> (mm <sup>-1</sup> )                | 5.109                                                                                              | 1.877                                                              |
| <i>F</i> (0 0 0)                            | 1552                                                                                               | 1432                                                               |
| <i>θ</i> range for data collection (°)      | 2.857 to 76.790                                                                                    | 2.814 to 76.681                                                    |
| Index ranges                                | -13 ≤ <i>h</i> ≤ 13<br>-20 ≤ <i>k</i> ≤ 19<br>-30 ≤ <i>l</i> ≤ 30                                  | -13 ≤ <i>h</i> ≤ 13<br>-20 ≤ <i>k</i> ≤ 19<br>-26 ≤ <i>l</i> ≤ 31  |
| Independent reflections                     | 15702 [R(int) = 0.0528]                                                                            | 16170 [R(int) = 0.0559]                                            |
| Completeness to <i>θ</i> = 67.684°          | 99.8%                                                                                              | 99.7%                                                              |
| Max. and min. transmission                  | 1.00000 and 0.49493                                                                                | 1.00000 and 0.25038                                                |
| Gof                                         | 1.042                                                                                              | 1.062                                                              |
| Final <i>R</i> indices [I > 2σ( <i>I</i> )] | <i>R</i> <sub>1</sub> = 0.0596<br>w <i>R</i> <sub>2</sub> = 0.1620                                 | <i>R</i> <sub>1</sub> = 0.0453<br>w <i>R</i> <sub>2</sub> = 0.1325 |
| <i>R</i> (all data)                         | <i>R</i> <sub>1</sub> = 0.0645<br>w <i>R</i> <sub>2</sub> = 0.1665                                 | <i>R</i> <sub>1</sub> = 0.0517<br>w <i>R</i> <sub>2</sub> = 0.1372 |
| Max/min (e Å <sup>3</sup> )                 | 1.921 and -1.586                                                                                   | 0.370 and -0.658                                                   |

**Table S2.** Computed excitation states for complex **1** in CH<sub>2</sub>Cl<sub>2</sub>.

| State | $\lambda(\text{nm})/E(\text{eV})$ | Configurations                                                                                                                                                                         | $f$    |
|-------|-----------------------------------|----------------------------------------------------------------------------------------------------------------------------------------------------------------------------------------|--------|
| 1     | 373.9 / 3.32                      | H→L (98)                                                                                                                                                                               | 0.0620 |
| 5     | 341.0 / 3.64                      | H-3→L (7); H-2→L (12); H-1→L+1 (77)                                                                                                                                                    | 0.0931 |
| 6     | 336.4 / 3.69                      | H-3→L (83); H-2→L+1 (4); H-1→L+1 (10)                                                                                                                                                  | 0.2539 |
| 9     | 320.3 / 3.87                      | H→L+3 (36); H→L+4 (40); H→L+5 (12)                                                                                                                                                     | 0.0634 |
| 25    | 296.9 / 4.18                      | H-3→L+6 (3); H-2→L+6 (23); H-1→L+5 (9);<br>H-1→L+6 (33); H→L+8 (21)                                                                                                                    | 0.0709 |
| 73    | 260.6 / 4.76                      | H-5→L+7 (2); H-3→L+16 (3); H-2→L+11 (3); H-2→L+12 (3);<br>H-2→L+13 (4); H-2→L+16 (19); H-2→L+17 (3); H-1→L+13 (8);<br>H-1→L+15 (7); H-1→L+16 (23); H-1→L+17 (4)                        | 0.0690 |
| 75    | 259.5 / 4.78                      | H-6→L+2 (3); H-6→L+3 (3); H-6→L+4 (3); H-6→L+5 (3);<br>H-5→L+7 (12); H-4→L+4 (3); H-4→L+6 (8);<br>H-4→L+8 (16); H-2→L+13 (5); H-2→L+15 (2);<br>H-1→L+15 (13); H-1→L+16 (4); H→L+15 (5) | 0.1330 |
| 78    | 258.3 / 4.80                      | H-6→L+7 (4); H-5→L+7 (21); H-4→L+6 (7); H-4→L+7 (3);<br>H-4→L+8 (4); H-2→L+14 (5); H-1→L+14 (5);<br>H-1→L+15 (13); H-1→L+16 (4); H→L+15 (9)                                            | 0.1855 |

**Table S3.** Computed excitation states for complex **2** in CH<sub>2</sub>Cl<sub>2</sub>.

| State | $\lambda(\text{nm})/E(\text{eV})$ | Configurations                                                                                                                                                                                                   | $f$    |
|-------|-----------------------------------|------------------------------------------------------------------------------------------------------------------------------------------------------------------------------------------------------------------|--------|
| 1     | 376.7 / 3.29                      | H→L (98)                                                                                                                                                                                                         | 0.0639 |
| 3     | 354.7 / 3.50                      | H-1→L (85); H→L+1 (11)                                                                                                                                                                                           | 0.0693 |
| 5     | 339.6 / 3.65                      | H-3→L (8); H-2→L (30); H-1→L+1 (58)                                                                                                                                                                              | 0.0664 |
| 6     | 335.8 / 3.69                      | H-3→L (82); H-1→L+1 (13)                                                                                                                                                                                         | 0.3044 |
| 8     | 323.4 / 3.83                      | H→L+3 (61); H→L+4 (14); H→L+5 (16)                                                                                                                                                                               | 0.0742 |
| 25    | 295.7 / 4.19                      | H-3→L+6 (4); H-2→L+6 (36); H-1→L+3 (2); H-1→L+5 (6);<br>H-1→L+6 (40); H→L+8 (3); H→L+9 (2)                                                                                                                       | 0.0617 |
| 38    | 282.5 / 4.39                      | H-4→L+3 (22); H-4→L+4 (51); H-2→L+3 (3);<br>H-2→L+4 (2); H-1→L+14 (3)                                                                                                                                            | 0.1021 |
| 72    | 259.2 / 4.78                      | H-5→L+2 (2); H-5→L+3 (4); H-5→L+4 (3); H-5→L+5 (4);<br>H-4→L+5 (3); H-4→L+6 (6); H-4→L+8 (6); H-2→L+11 (2);<br>H-2→L+13 (2); H-2→L+14 (3); H-2→L+16 (6); H-1→L+14 (6);<br>H-1→L+15 (11); H→L+14 (11); H→L+15 (5) | 0.1844 |
| 73    | 258.9 / 4.79                      | H-5→L+3 (12); H-5→L+5 (7); H-4→L+4 (2); H-4→L+5 (4);<br>H-4→L+6 (13); H-4→L+7 (3); H-4→L+8 (12);<br>H-1→L+14 (3); H→L+14 (18); H→L+15 (7)                                                                        | 0.0881 |
| 77    | 257.4 / 4.82                      | H-7→L+1 (3); H-5→L+4 (3); H-4→L+6 (2); H-3→L+14 (6);<br>H-1→L+14 (32); H-1→L+15 (3); H→L+14 (16);<br>H→L+15 (6); H→L+17 (2); H→L+18 (2)                                                                          | 0.1446 |

**Table S4.** Computed excitation states for complex **3** in CH<sub>2</sub>Cl<sub>2</sub>.

| State | $\lambda(\text{nm})/E(\text{eV})$ | Configurations                                                                                                                                         | $f$    |
|-------|-----------------------------------|--------------------------------------------------------------------------------------------------------------------------------------------------------|--------|
| 1     | 377.6 / 3.28                      | H-1→L (97)                                                                                                                                             | 0.0512 |
| 5     | 352.5 / 3.52                      | H-3→L (5); H-2→L (89)                                                                                                                                  | 0.0680 |
| 8     | 336.0 / 3.69                      | H-4→L (20); H-3→L (6); H-3→L+1 (2);<br>H-2→L+1 (58); H→L+4 (8)                                                                                         | 0.2306 |
| 21    | 313.3 / 3.96                      | H-2→L+3 (2); H-1→L+3 (3); H-1→L+6 (74);<br>H-1→L+7 (8); H→L+7 (3)                                                                                      | 0.0610 |
| 26    | 307.4 / 4.03                      | H-7→L+1 (6); H-5→L+1 (23); H-1→L+6 (4);<br>H-1→L+7 (49); H→L+9 (4)<br>H-8→L+1 (19); H-7→L+1 (5); H-5→L+2 (25);                                         | 0.0659 |
| 50    | 291.1 / 4.26                      | H-5→L+3 (4); H-5→L+4 (3); H-3→L+2 (7);<br>H-1→L+11 (9); H→L+11 (4); H→L+12 (14)                                                                        | 0.0686 |
| 57    | 285.2 / 4.35                      | H-9→L+1 (2); H-6→L+4 (4); H-6→L+5 (72);<br>H-4→L+4 (6); H-2→L+14 (4)                                                                                   | 0.0897 |
| 82    | 272.6 / 4.55                      | H-9→L+5 (4); H-8→L+2 (4); H-8→L+4 (2); H-7→L+2 (4);<br>H-5→L+7 (3); H-3→L+11 (4); H-1→L+13 (9); H-1→L+15 (7);<br>H-1→L+16 (5); H→L+17 (30); H→L+18 (3) | 0.1468 |

**Table S5.** Computed excitation states for complex **4** in CH<sub>2</sub>Cl<sub>2</sub>.

| State | $\lambda(\text{nm})/E(\text{eV})$ | Configurations                                                                                                                                                                                                | $f$    |
|-------|-----------------------------------|---------------------------------------------------------------------------------------------------------------------------------------------------------------------------------------------------------------|--------|
| 1     | 376.4 / 3.29                      | H-1→L (94); H→L (4)                                                                                                                                                                                           | 0.0527 |
| 8     | 335.0 / 3.70                      | H-4→L (2); H-3→L (27); H-2→L+1 (61); H→L+4 (3)                                                                                                                                                                | 0.2378 |
| 49    | 287.1 / 4.32                      | H-7→L+1 (2); H-6→L+2 (39); H-6→L+3 (2);<br>H-3→L+2 (21); H→L+12 (18)                                                                                                                                          | 0.1419 |
| 80    | 270.6 / 4.58                      | H-4→L+8 (18); H-4→L+9 (8); H-4→L+11 (2); H-3→L+6 (3);<br>H-3→L+8 (6); H-3→L+9 (2); H-2→L+8 (5); H-2→L+10 (6);<br>H-1→L+16 (2); H→L+13 (3); H→L+17 (17); H→L+18 (5)<br>H-6→L+6 (11); H-4→L+8 (9); H-4→L+9 (2); | 0.1184 |
| 81    | 270.1 / 4.59                      | H-3→L+6 (3); H-2→L+8 (4); H-2→L+9 (7);<br>H-2→L+11 (10); H-1→L+13 (3); H→L+17 (31)                                                                                                                            | 0.1380 |
| 98    | 262.8 / 4.72                      | H-8→L+4 (2); H-5→L+5 (2); H-5→L+6 (9); H-5→L+7 (11);<br>H-2→L+14 (8); H→L+13 (2); H→L+14 (41); H→L+16 (5)                                                                                                     | 0.1174 |

**Table S6.** Computed excitation states for complex **5** in CH<sub>2</sub>Cl<sub>2</sub>.

| State | $\lambda(\text{nm})/E(\text{eV})$ | Configurations                                                                                                                                         | $f$    |
|-------|-----------------------------------|--------------------------------------------------------------------------------------------------------------------------------------------------------|--------|
| 1     | 377.5 / 3.28                      | H-1→L (85); H→L (13)                                                                                                                                   | 0.0489 |
| 8     | 334.5 / 3.71                      | H-3→L (27); H-2→L+1 (63); H→L+4 (3)                                                                                                                    | 0.2320 |
| 49    | 286.3 / 4.33                      | H-8→L+1 (7); H-6→L+2 (25); H-3→L+2 (34);<br>H-1→L+12 (3); H→L+11 (2); H→L+12 (15)                                                                      | 0.1206 |
| 50    | 285.3 / 4.35                      | H-7→L+1 (4); H-5→L+4 (17); H-5→L+5 (56);<br>H-3→L+4 (3); H-2→L+15 (2)                                                                                  | 0.1010 |
| 77    | 269.7 / 4.60                      | H-8→L+2 (2); H-8→L+4 (3); H-6→L+6 (7); H-4→L+8 (5);<br>H-3→L+6 (12); H-3→L+7 (4); H-3→L+8 (3); H-2→L+10 (15);<br>H-2→L+11 (3); H→L+17 (7); H→L+18 (11) | 0.1112 |
| 78    | 269.1 / 4.61                      | H-8→L+2 (2); H-6→L+6 (4); H-4→L+9 (4);<br>H-2→L+9 (4); H-2→L+10 (4); H-2→L+11 (7);<br>H-1→L+16 (5); H→L+16 (8); H→L+17 (39)                            | 0.1957 |
| 98    | 260.9 / 4.75                      | H-7→L+3 (3); H-5→L+6 (4); H-2→L+12 (4); H-2→L+13 (5);<br>H-2→L+14 (4); H-2→L+15 (5); H-1→L+13 (3);<br>H-1→L+14 (21); H-1→L+15 (23); H-1→L+16 (4)       | 0.3006 |

**Table S7.** Computed excitation states for complex **6** in CH<sub>2</sub>Cl<sub>2</sub>.

| State | $\lambda(\text{nm})/E(\text{eV})$ | Configurations                                                                                                                                                                                       | $f$    |
|-------|-----------------------------------|------------------------------------------------------------------------------------------------------------------------------------------------------------------------------------------------------|--------|
| 1     | 379.8 / 3.26                      | H-1→L (51); H→L (44)                                                                                                                                                                                 | 0.0603 |
| 5     | 350.3 / 3.54                      | H-4→L (7); H-3→L (85)                                                                                                                                                                                | 0.0693 |
| 8     | 335.3 / 3.70                      | H-5→L (18); H-4→L (11); H-4→L+1 (3); H-3→L+1 (44);<br>H-2→L (6); H→L+2 (3); H→L+4 (3)                                                                                                                | 0.2150 |
| 11    | 330.3 / 3.75                      | H-1→L+2 (15); H-1→L+3 (12); H-1→L+4 (42); H-1→L+6 (4);<br>H→L+2 (5); H→L+3 (3); H→L+4 (7); H→L+6 (4)                                                                                                 | 0.0781 |
| 15    | 323.1 / 3.84                      | H-5→L+1 (8); H-4→L+2 (3); H-2→L+2 (9); H-2→L+3 (4);<br>H-2→L+4 (24); H-1→L+4 (10); H→L+6 (29)                                                                                                        | 0.0736 |
| 35    | 302.9 / 4.09                      | H-10→L (3); H-4→L+4 (4); H-1→L+5 (2);<br>H-1→L+8 (50); H→L+9 (21)                                                                                                                                    | 0.0864 |
| 41    | 299.1 / 4.15                      | H-10→L (9); H-9→L (11); H-4→L+4 (5); H-1→L+8 (2);<br>H→L+9 (24); H→L+10 (24); H→L+11 (4)                                                                                                             | 0.0637 |
| 68    | 285.4 / 4.34                      | H-11→L+1 (3); H-7→L+5 (66); H-5→L+6 (3); H-3→L+4 (2);<br>H-3→L+6 (2); H-3→L+15 (3); H-1→L+12 (3)                                                                                                     | 0.0855 |
| 75    | 281.4 / 4.41                      | H-9→L+4 (3); H-8→L+2 (3); H-6→L+6 (13); H-5→L+4 (3);<br>H-3→L+7 (16); H-2→L+7 (4); H-1→L+13 (6); H→L+13 (29)                                                                                         | 0.1298 |
| 91    | 274.6 / 4.51                      | H-9→L+4 (3); H-6→L+7 (17); H-5→L+7 (6); H-4→L+9 (8);<br>H-4→L+11 (3); H-2→L+9 (10); H-2→L+10 (11); H-2→L+11 (5);<br>H-1→L+14 (8); H→L+14 (3); H→L+16 (2)                                             | 0.1600 |
| 92    | 274.3 / 4.52                      | H-9→L+4 (4); H-6→L+7 (9); H-5→L+6 (2); H-5→L+7 (7);<br>H-4→L+8 (15); H-4→L+9 (2); H-4→L+10 (5); H-3→L+9 (2);<br>H-2→L+7 (2); H-2→L+8 (2); H-2→L+10 (16);<br>H-2→L+11 (3); H-2→L+12 (2); H-1→L+14 (3) | 0.0743 |

**Table S8.** Computed excitation states for complex **7** in CH<sub>2</sub>Cl<sub>2</sub>.

| State | $\lambda(\text{nm})/E(\text{eV})$ | Configurations                                                                                                                                                                                               | $f$    |
|-------|-----------------------------------|--------------------------------------------------------------------------------------------------------------------------------------------------------------------------------------------------------------|--------|
| 1     | 379.3 / 3.27                      | H-1→L (45); H→L (51)                                                                                                                                                                                         | 0.0621 |
| 4     | 350.2 / 3.54                      | H-4→L+1 (4); H-3→L (8); H-2→L (6);<br>H-2→L+1 (8); H-1→L+1 (43); H→L+1 (27)                                                                                                                                  | 0.0753 |
| 7     | 337.9 / 3.67                      | H-5→L (25); H-4→L (11); H-3→L+1 (10);<br>H-2→L+1 (7); H→L+3 (36)                                                                                                                                             | 0.0767 |
| 8     | 334.1 / 3.71                      | H-5→L (11); H-4→L (16); H-4→L+1 (3);<br>H-3→L+1 (33); H-2→L+1 (26); H→L+1 (2)<br>H-5→L (2); H-4→L (2); H-2→L (4);                                                                                            | 0.2121 |
| 10    | 328.3 / 3.78                      | H-2→L+4 (3); H-1→L+3 (39); H-1→L+4 (10);<br>H-1→L+6 (3); H→L+4 (21); H→L+6 (5)                                                                                                                               | 0.0752 |
| 23    | 312.2 / 3.97                      | H-1→L+7 (23); H→L+2 (2); H→L+7 (62)                                                                                                                                                                          | 0.0729 |
| 60    | 285.3 / 4.35                      | H-10→L+1 (4); H-6→L+5 (74)                                                                                                                                                                                   | 0.0830 |
| 63    | 284.1 / 4.36                      | H-8→L+3 (6); H-7→L+3 (3); H-5→L+7 (3); H-4→L+2 (3);<br>H-4→L+6 (3); H-4→L+7 (13); H-3→L+7 (3); H-2→L+6 (2);<br>H-2→L+7 (39); H-2→L+8 (2); H→L+13 (4)<br>H-9→L+3 (24); H-9→L+4 (13); H-8→L+4 (7);             | 0.1071 |
| 70    | 280.4 / 4.42                      | H-7→L+3 (7); H-5→L+4 (5); H-4→L+6 (15);<br>H-3→L+6 (2); H→L+12 (5); H→L+13 (6)<br>H-9→L+4 (9); H-9→L+6 (2); H-8→L+4 (7); H-8→L+6 (2);                                                                        | 0.1135 |
| 85    | 273.5 / 4.53                      | H-6→L+3 (7); H-5→L+6 (3); H-5→L+8 (3); H-4→L+7 (2);<br>H-4→L+8 (7); H-3→L+7 (3); H-3→L+8 (11); H-3→L+9 (4);<br>H-2→L+7 (4); H-2→L+9 (5); H-2→L+10 (8)<br>H-9→L+6 (9); H-8→L+4 (3); H-8→L+6 (5); H-5→L+6 (3); | 0.1403 |
| 87    | 272.9 / 4.54                      | H-4→L+8 (5); H-4→L+10 (3); H-3→L+7 (2); H-2→L+8 (2);<br>H-2→L+9 (2); H-2→L+10 (6); H-2→L+11 (3); H-1→L+14 (14);<br>H-1→L+15 (6); H→L+16 (3); H→L+17 (7)                                                      | 0.1105 |

## 6. References

- (1) W. Xu, B. Chen, L. Liu, X. X. Zhong, G. J. Zhou, F. B. Li, H. M. Qin. *J. Lumin.*, 2024, **266**, 120257.
- (2) L. Liu, X. Chen. CN111233924A, 2020.
- (3) *SAINTE Reference Manual*, Siemens Energy and Automation, Madison, WI, 1994.
- (4) G. M. Sheldrick, *SADABS, Empirical Absorption Correction Program*, University of Göttingen, Göttingen, Germany, 1997.
- (5) G. M. Sheldrick, *SHELXTL Reference Manual, Version 5.1*, Siemens Energy and Automation, Madison, WI, 1997.
- (6) M. J. Frisch, G. W. Trucks, H. B. Schlegel, G. E. Scuseria, M. A. Robb, J. R. Cheeseman, G. Scalmani, V. Barone, G. A. Petersson, H. Nakatsuji, X. Li, M. Caricato, A. V. Marenich, J. Bloino, B. G. Janesko, R. Gomperts, B. Mennucci, H. P. Hratchian, J. V. Ortiz, A. F. Izmaylov, J. L. Sonnenberg, D. Williams-Young, F. Ding, F. Lipparini, F. Egidi, J. Goings, B. Peng, A.

Petrone, T. Henderson, D. Ranasinghe, V. G. Zakrzewski, J. Gao, N. Rega, G. Zheng, W. Liang, M. Hada, M. Ehara, K. Toyota, R. Fukuda, J. Hasegawa, M. Ishida, T. Nakajima, Y. Honda, O. Kitao, H. Nakai, T. Vreven, K. Throssell, J. A. Montgomery, Jr., J. E. Peralta, F. Ogliaro, M. J. Bearpark, J. J. Heyd, E. N. Brothers, K. N. Kudin, V. N. Staroverov, T. A. Keith, R. Kobayashi, J. Normand, K. Raghavachari, A. P. Rendell, J. C. Burant, S. S. Iyengar, J. Tomasi, M. Cossi, J. M. Millam, M. Klene, C. Adamo, R. Cammi, J. W. Ochterski, R. L. Martin, K. Morokuma, O. Farkas, J. B. Foresman, and D. J. Fox, *Gaussian 16, Revision A.03*, Gaussian Inc., Wallingford CT, 2016.

(7) T. Lu, F. W. Chen, *Acta Chim. Sinica*, 2011, **69**(20), 2393-2406.

(8) T. Lu, F. W. Chen, *J. Comput. Chem.*, 2012, **33**(5), 580-592.
